# Supplementary material for: Clinical and Demographic Factors Associated With COVID-19, Severe COVID-19, and SARS-CoV-2 Infection in Adults: A Secondary Cross-Protocol Analysis of 4 Randomized Clinical Trials
Source: PubMed Central journal article supplement (PMC10346130; doi:10.1001/jamanetworkopen.2023.23349), 2023-07-13
Supplement: jamanetwopen-e2323349-s001.pdf [file jamanetwopen-e2323349-s001.pdf]

## Supplemental Online Content

Theodore DA, Branche AR, Zhang L, et al; COVID-19 Prevention Network (CoVPN). Clinical and demographic factors associated with COVID-19, severe COVID-19, and SARS-CoV-2 infection in adults: a secondary cross-protocol analysis of 4 randomized clinical trials. *JAMA Netw Open*. 2023;6(7):e2323349. doi:10.1001/jamanetworkopen.2023.23349

### **eMethods.**

**eFigure 1.** Cox Proportional Hazard Scaled Schoenfeld Residual Plots for Each Risk Factor

**eFigure 2.** Smoothed Hazard Estimates of COVID-19 in Trial Placebo Participants Plotted by Calendar Time and Epidemiologic Trends

**eFigure 3.** Univariate Cox Proportional Hazard Regression Models for the COVID-19 and Severe COVID-19 Coprimary End Points

**eFigure 4.** Univariate Cox Proportional Hazard Regression Models for the Subclinical SARS-CoV-2 and Any SARS-CoV-2 Secondary End Points

**eFigure 5.** Univariate Cox Proportional Hazard Regression Model for the Severe COVID-19 End Point Among Participants With COVID-19

**eFigure 6.** Multivariate Cox Proportional Hazard Regression Model for the Severe COVID-19 End Point Among Participants With COVID-19

**eFigure 7.** Univariate Cox Proportional Hazard Regression Model for the COVID-19 End Point Among Participants With SARS-CoV-2

**eFigure 8.** Multivariate Cox Proportional Hazard Regression Model for the COVID-19 End Point Among Participants With SARS-CoV-2

**eFigure 9.** Multivariate Cox Proportional Hazard Regression Models With 2-Way Interaction Terms for the COVID-19 End Point

**eTable 1.** Study Case Definitions

**eTable 2.** Schedule of Antinucleocapsid Protein Testing Across Protocols

**eTable 3.** CDC Risk Factors for Severe Disease

**eTable 4.** Study End Points Stratified by Trial

**eTable 5.** Variant Counts From COVID-19 Cases

This supplemental material has been provided by the authors to give readers additional information about their work.

## eMethods

### Study Outcomes

The primary Covid-19 study outcome of this analysis was determined by a harmonized definition across trials with minor differences as detailed below. All trials required molecular (PCR or NAAT) confirmation of SARS-CoV-2 infection in addition to listed symptoms.

The Moderna trial defined Covid-19 symptomatic illness as having one or more respiratory symptoms (cough, shortness of breath or pneumonia) or at least two systemic symptoms (fever  $\geq 38^{\circ}\text{C}$ , chills, myalgia, headache, sore throat, anosmia or ageusia). The AstraZeneca trial defined Covid-19 symptomatic illness as having 1 day of fever, dyspnea or shortness of breath or  $\geq 2$  days of chills, cough, myalgia, fatigue, headache, vomiting, diarrhea, anosmia, ageusia, sore throat, congestion, runny nose. The Janssen trial defined Covid-19 symptomatic illness as mild (FDA criteria for mild Covid-19), moderate (one or more: respiratory symptoms, DVT; or two or more: FDA criteria for moderate COVID-19, anosmia, ageusia, red or bruised looking feet or toes) and severe disease (FDA for severe or critical Covid-19 disease). The Novavax trial defined Covid-19 symptomatic illness as mild (FDA criteria for mild Covid-19), moderate (high fever  $\geq 38.4^{\circ}\text{C}$  for more than 3 days, evidence of significant lower respiratory tract infection) and severe (FDA criteria for severe or critical Covid-19 disease) disease.

### Derivations of Variables

#### Baseline Comorbidities

In this meta-analysis, comorbid conditions (yes or no) were defined as the presence of a given medical condition indicated in either the medical history eCRF or the comorbid questionnaire CRF data. Comorbid conditions listed by CDC as associated with severe COVID-19 were first mapped to MedDRA coding. Specifically, the CDC updated on Feb 15, 2022 the listing of underlying medical conditions associated with higher risk for severe COVID-19 (<https://www.cdc.gov/coronavirus/2019-ncov/science/science-briefs/underlying-evidence-table.html>). All of the medical conditions in this CDC list were mapped to MedDRA 24.0- English version coding for the applicable Preferred Term (PT) and High-level Term (HLT) for each medical condition. The medical diagnosis listed in medical history eCRF of each participant were available as MedDRA terms. The frequencies of occurrence of each of these conditions were tabulated and included as an independent variable. The medical conditions and subcategories with a frequency of occurrence  $< 5\%$  were combined or eliminated for the construction of variables analyzed in the final dataset (eTable 3). The mapped coding was then used to determine the presence of each condition as listed in the medical history eCRF.

#### Occupational Risk

Occupational risk was determined by attributing Occupational Safety and Health Administration (OSHA) hazard recognition scores to self-reported workplace information provided by participants. OSHA functions as a regulatory agency under the United States Department of Labor to ensure safe and healthful working conditions, and as such, defined categories in response to the Covid-19 pandemic to aid in the assessment and mitigation of exposure risk in the workplace. Low exposure risk jobs have minimal contact with the public or coworkers. Medium exposure risk jobs have frequent or sustained close contact with the public or coworkers in outdoor or well-ventilated settings. High exposure risk jobs include close or poorly ventilated working conditions with known or suspected sources of SARS-CoV-2 (such as a hospital, grocery store or public transit). Very high exposure risk jobs are performing specific medical, postmortem or laboratory procedures. If individuals selected more than one category, the maximum score was taken. High and very high exposure risk categories were combined for analysis.

#### Living Situation Risk

Living situation risk synthesizes variables across all four trials and is scored on a scale of low, medium, high, or very high risk. It is based on housing type for the Moderna trial and number of co-habitants for the other 3 trials. For the AstraZeneca, Janssen, and Novavax trials, low, medium, high, and very high risk conditions corresponded to 0-1, 2, 3 and 4 or more co-habitants, respectively. For the Moderna study, individuals self-reported the housing type(s) that applied. Each housing type was assigned to low (participants specified as not having risk of exposure related to housing), medium (single-family or detached housing, housing without shared entrances or elevators), high (congregate settings such as dormitory, group housing, or high density such as apartments with shared entrances or elevators), or very high (nursing homes, long-term care facilities, shelters, and multi-family dwellings) risk categories. If participants selected more than one housing type, the highest risk score was taken. If “other” was selected, a value was imputed using the most frequent category within a given study.

**eFigure 1: Cox Proportional Hazard Scaled Schoenfeld Residual Plots for Each Risk Factor.**

**A.**

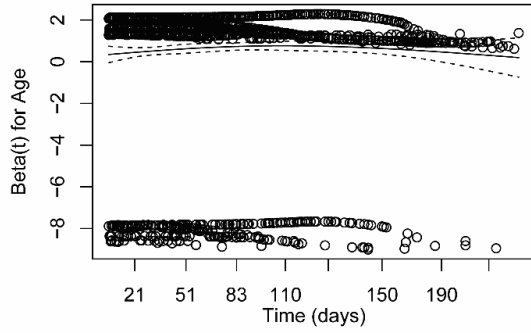

**B.**

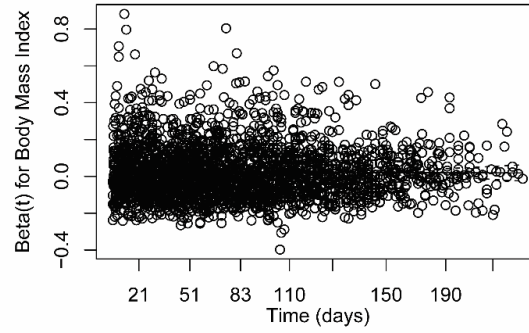

**C.**

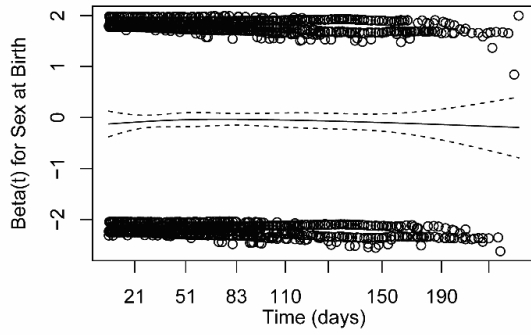

**D.**

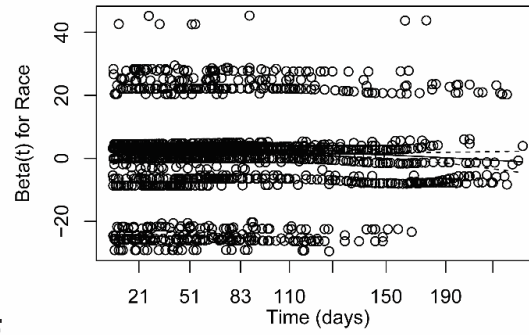

**E.**

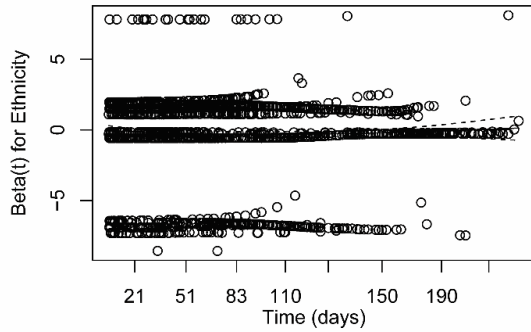

**F.**

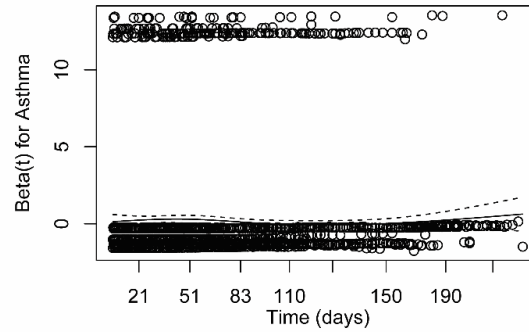

**G.**

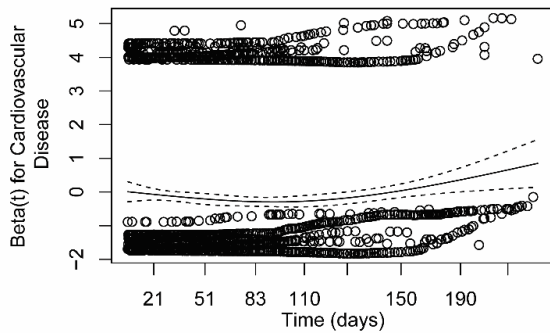

**H.**

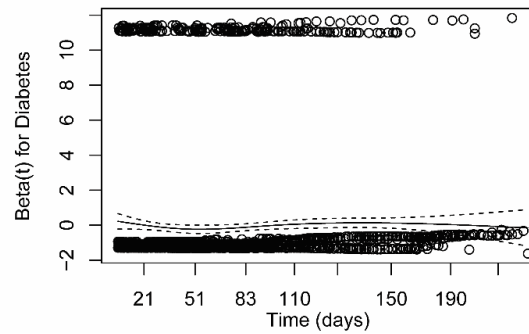

**I.**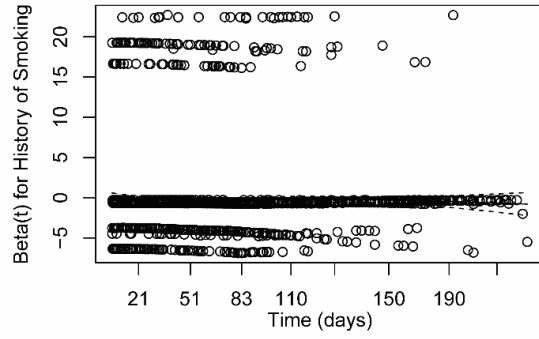**J.**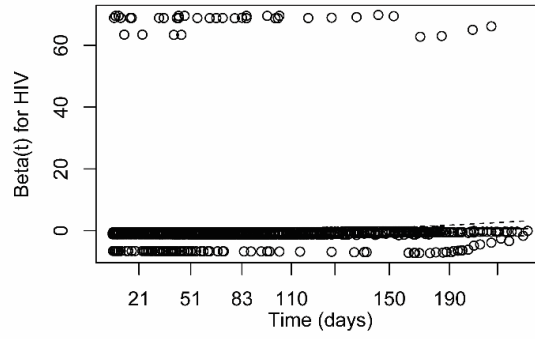**K.**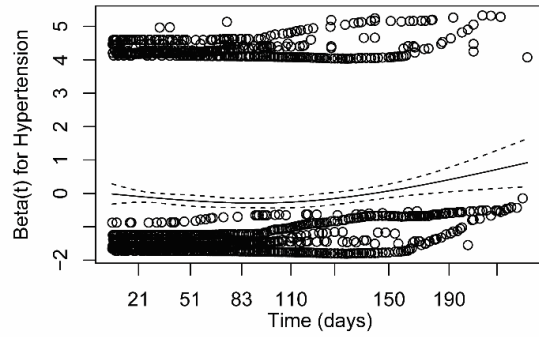**L.**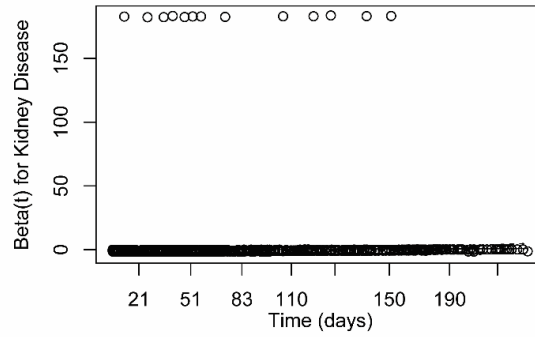**M.**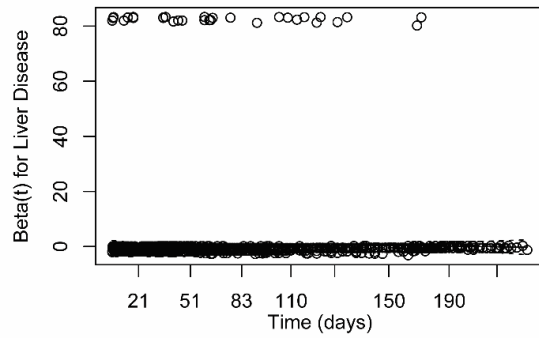**N.**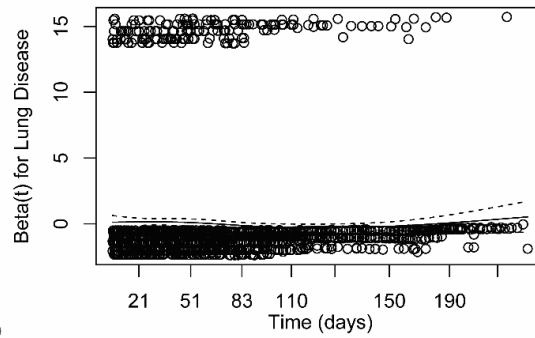**O.**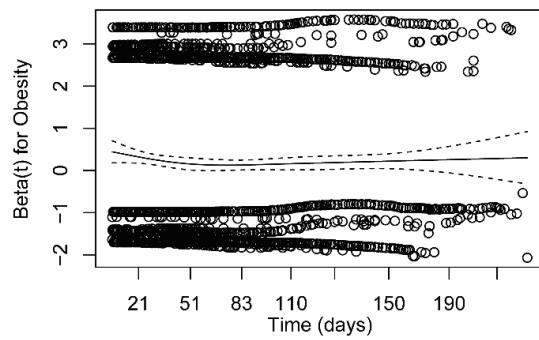**P.**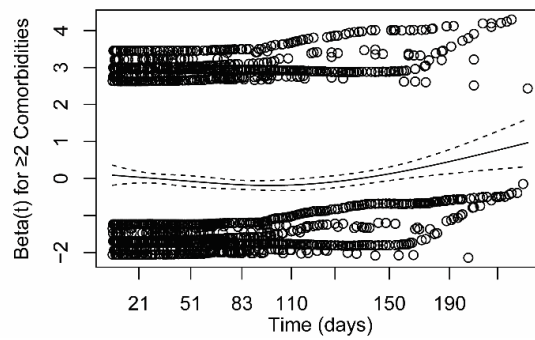

**Q.**

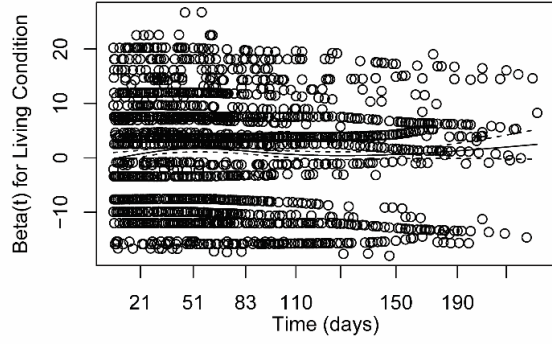

**R.**

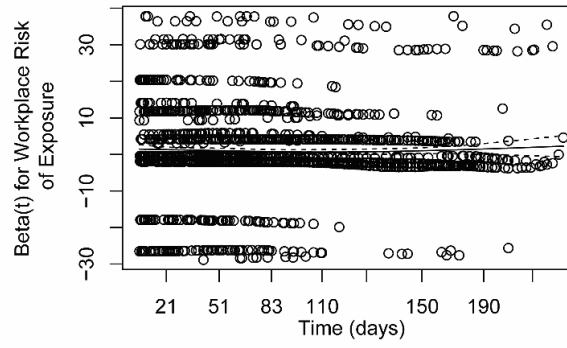

**S.**

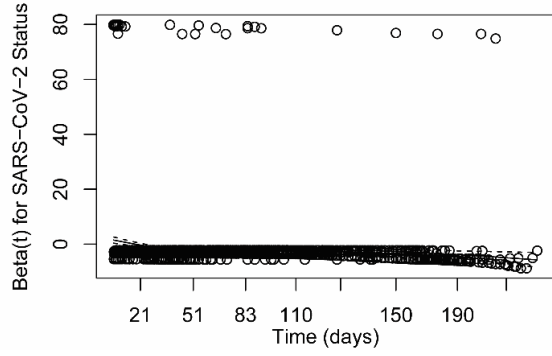

## eFigure 2: Smoothed Hazard Estimates of COVID-19 in Trial Placebo Participants Plotted by Calendar Time and Epidemiologic Trends.

Smoothed hazard estimates are plotted over calendar time for the COVID-19 endpoint in each trial (Top). Epidemiological trends within the countries contributing data to the trials (top 4 countries for Janssen), including number of cases and emergence of viral variants, are presented directly below corresponding hazard estimates and based on information reported on COVID.who.int and gisaid.org. Variants of Interest or Concern accounting for  $\geq 20\%$  of a weekly submission for each region are included (see legend). The baseline curves on the epidemiologic figures express new cases within the trial. The solid black vertical line denotes the start of enrollment for each trial and the dashed black vertical line denotes the data cutoff point.

### COVID-19 Risk

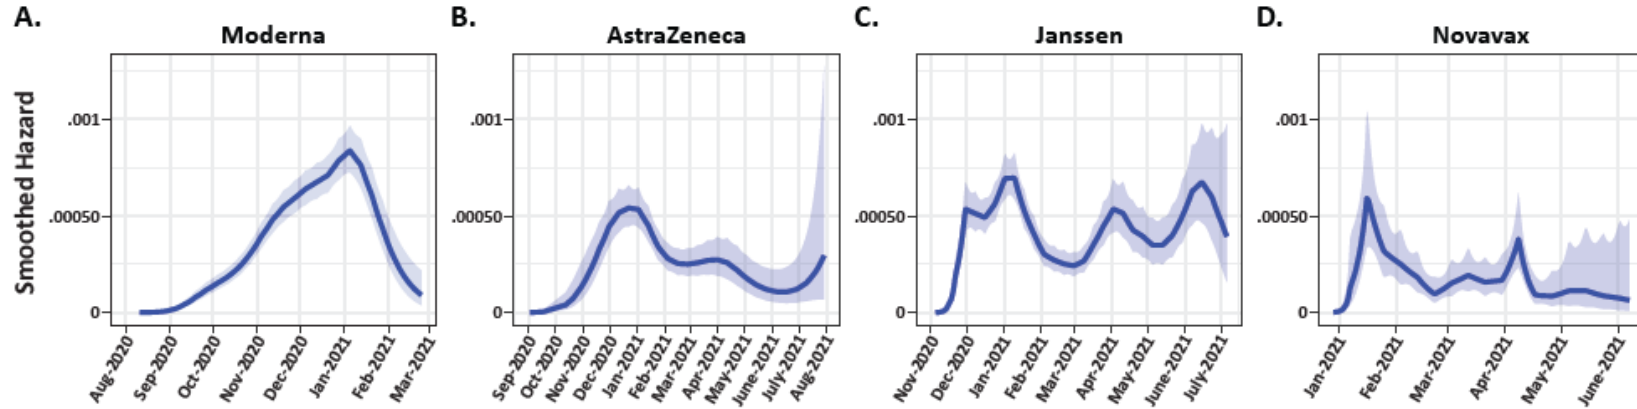

### SARS-CoV-2 Epidemiological Data for Countries Involved in Each Study

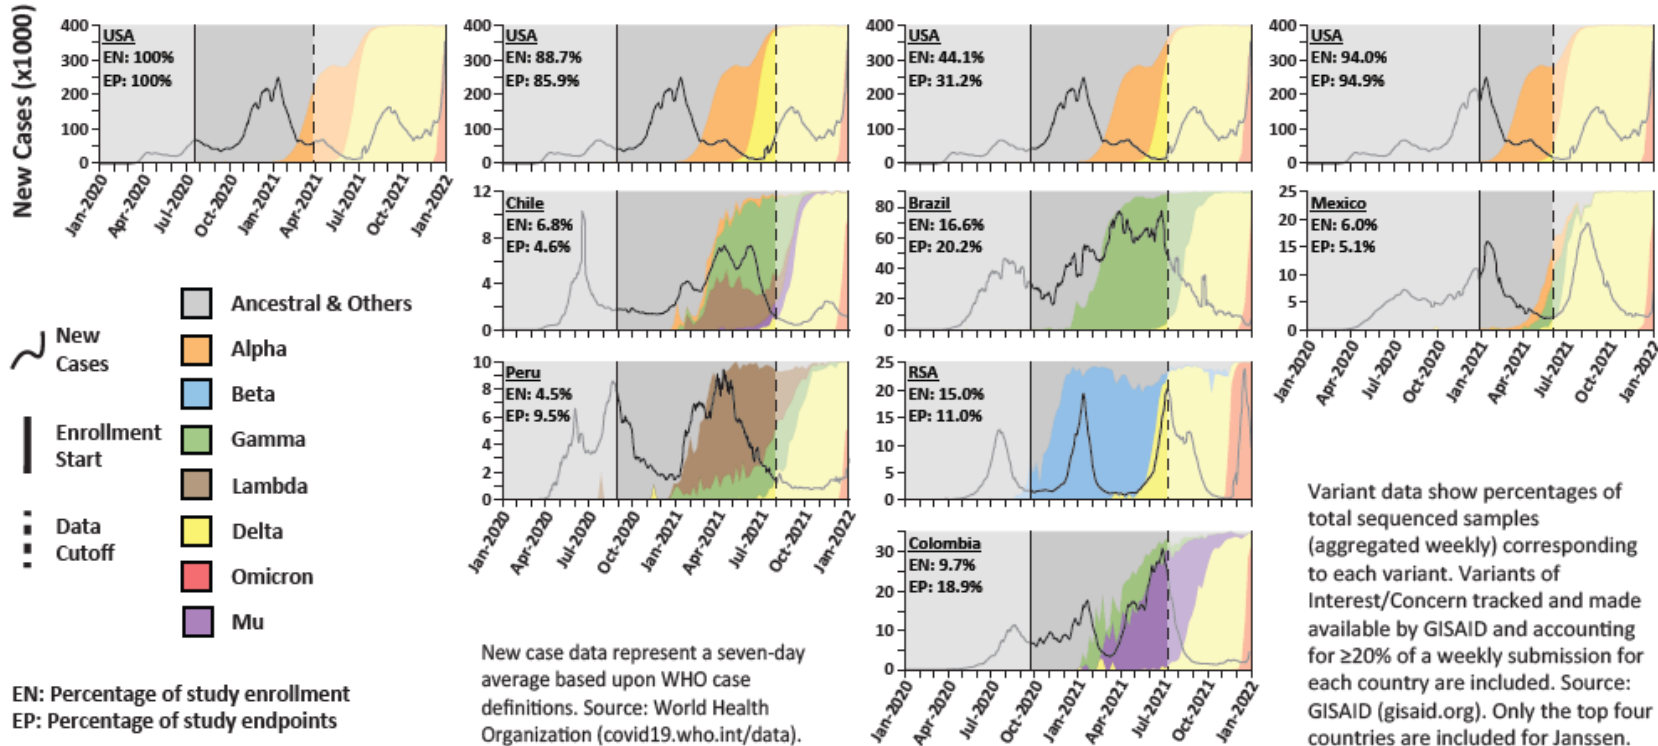

### eFigure 3: Univariate Cox Proportional Hazard Regression Models for the COVID-19 and Severe COVID-19 Co-primary Endpoints.

All models adjusted for study (Moderna, AstraZeneca, Janssen, Novavax), Region (South America, North America, South Africa) and calendar time to account for potentially different baseline hazard functions across studies, regions, and time. Univariate hazard estimates for the two co-primary endpoints of COVID-19 (black, solid circle) and severe COVID-19 (red, open circle) are shown. The  $\geq 3$  Comorbidities and  $\geq 4$  Comorbidities variables were not considered for inclusion in the multivariate analysis. Unadjusted and adjusted P-values are shown. P-values  $\leq 0.01$  were considered statistically significant.

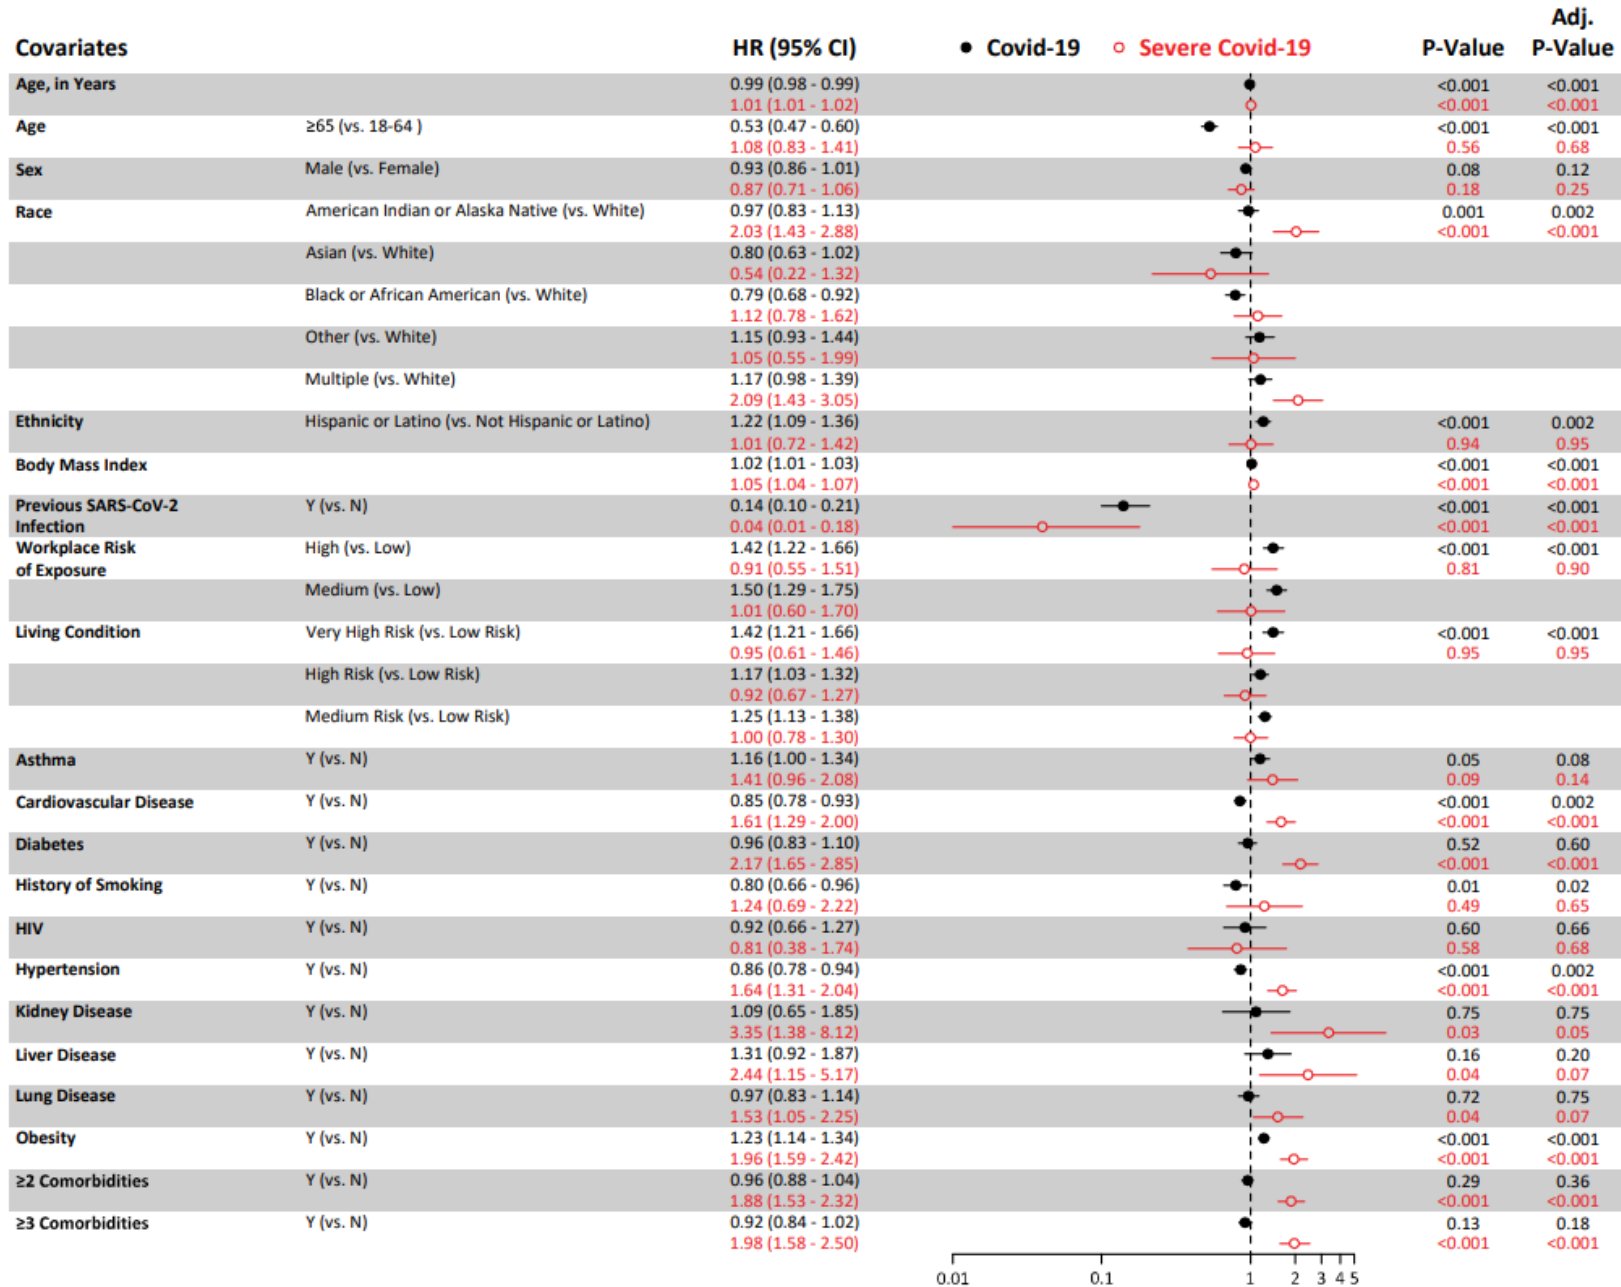

### eFigure 4: Univariate Cox Proportional Hazard Regression Models for the Subclinical SARS-CoV-2 and Any SARS-CoV-2 Secondary Endpoints.

All models adjusted for study (Moderna, AstraZeneca, Janssen, Novavax), Region (South America, North America, South Africa) and calendar time to account for potentially different baseline hazard functions across studies, regions, and time. Univariate hazard estimates for the secondary endpoints, any SARS-CoV-2 infection (black, solid circle) and subclinical SARS-CoV-2 infection (blue, open circle) are shown. The  $\geq 3$  Comorbidities and  $\geq 4$  Comorbidities variables were not considered for inclusion in the multivariate analysis. Unadjusted and adjusted P-values are shown. P-values  $\leq 0.01$  were considered statistically significant.

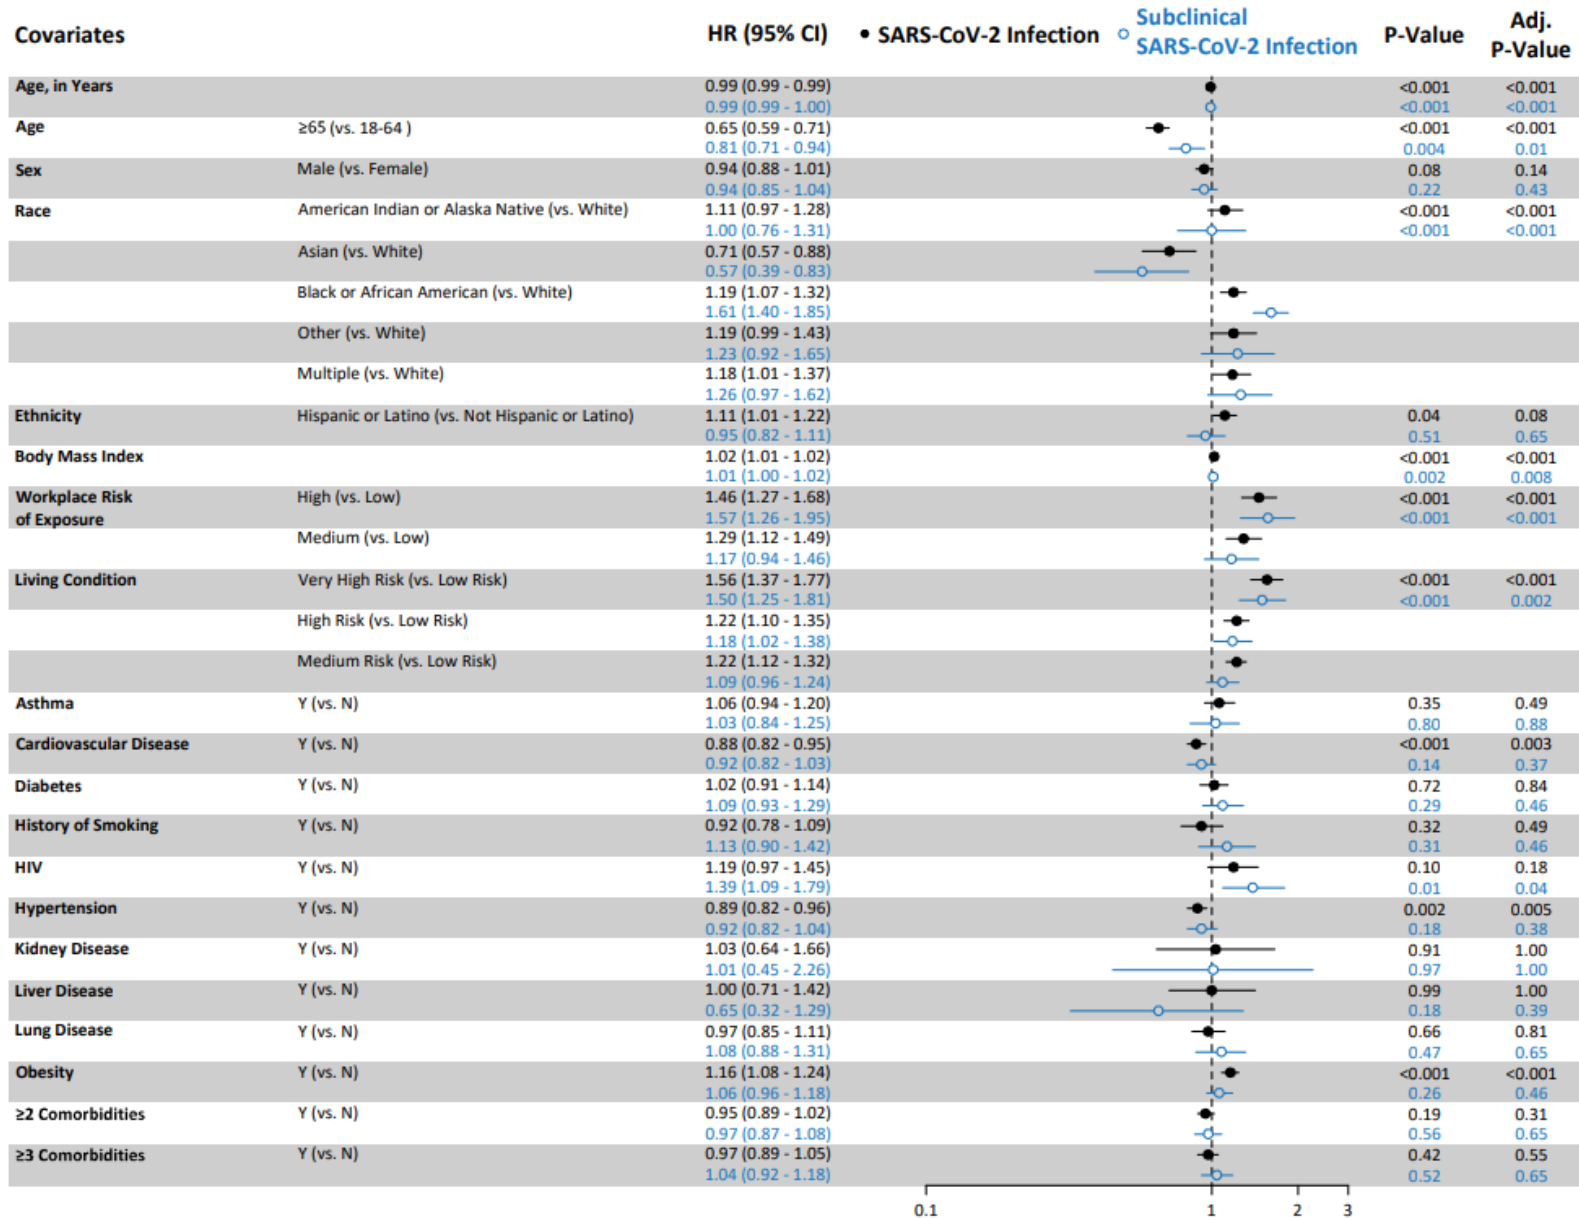



**eFigure 5: Univariate Cox Proportional Hazard Regression Model for the Severe COVID-19 Endpoint among Participants with COVID-19.**

All models adjusted for study (Moderna, AstraZeneca, Janssen, Novavax), Region (South America, North America, South Africa) and calendar time to account for potentially different baseline hazard functions across studies, regions, and time. Univariate hazard estimates for the co-primary endpoint Severe COVID-19 among participants with COVID-19 are shown. The  $\geq 3$  Comorbidities and  $\geq 4$  Comorbidities variables were not considered for inclusion in the multivariate analysis. Unadjusted and adjusted P-values are shown. P-values  $\leq 0.01$  were considered statistically significant.

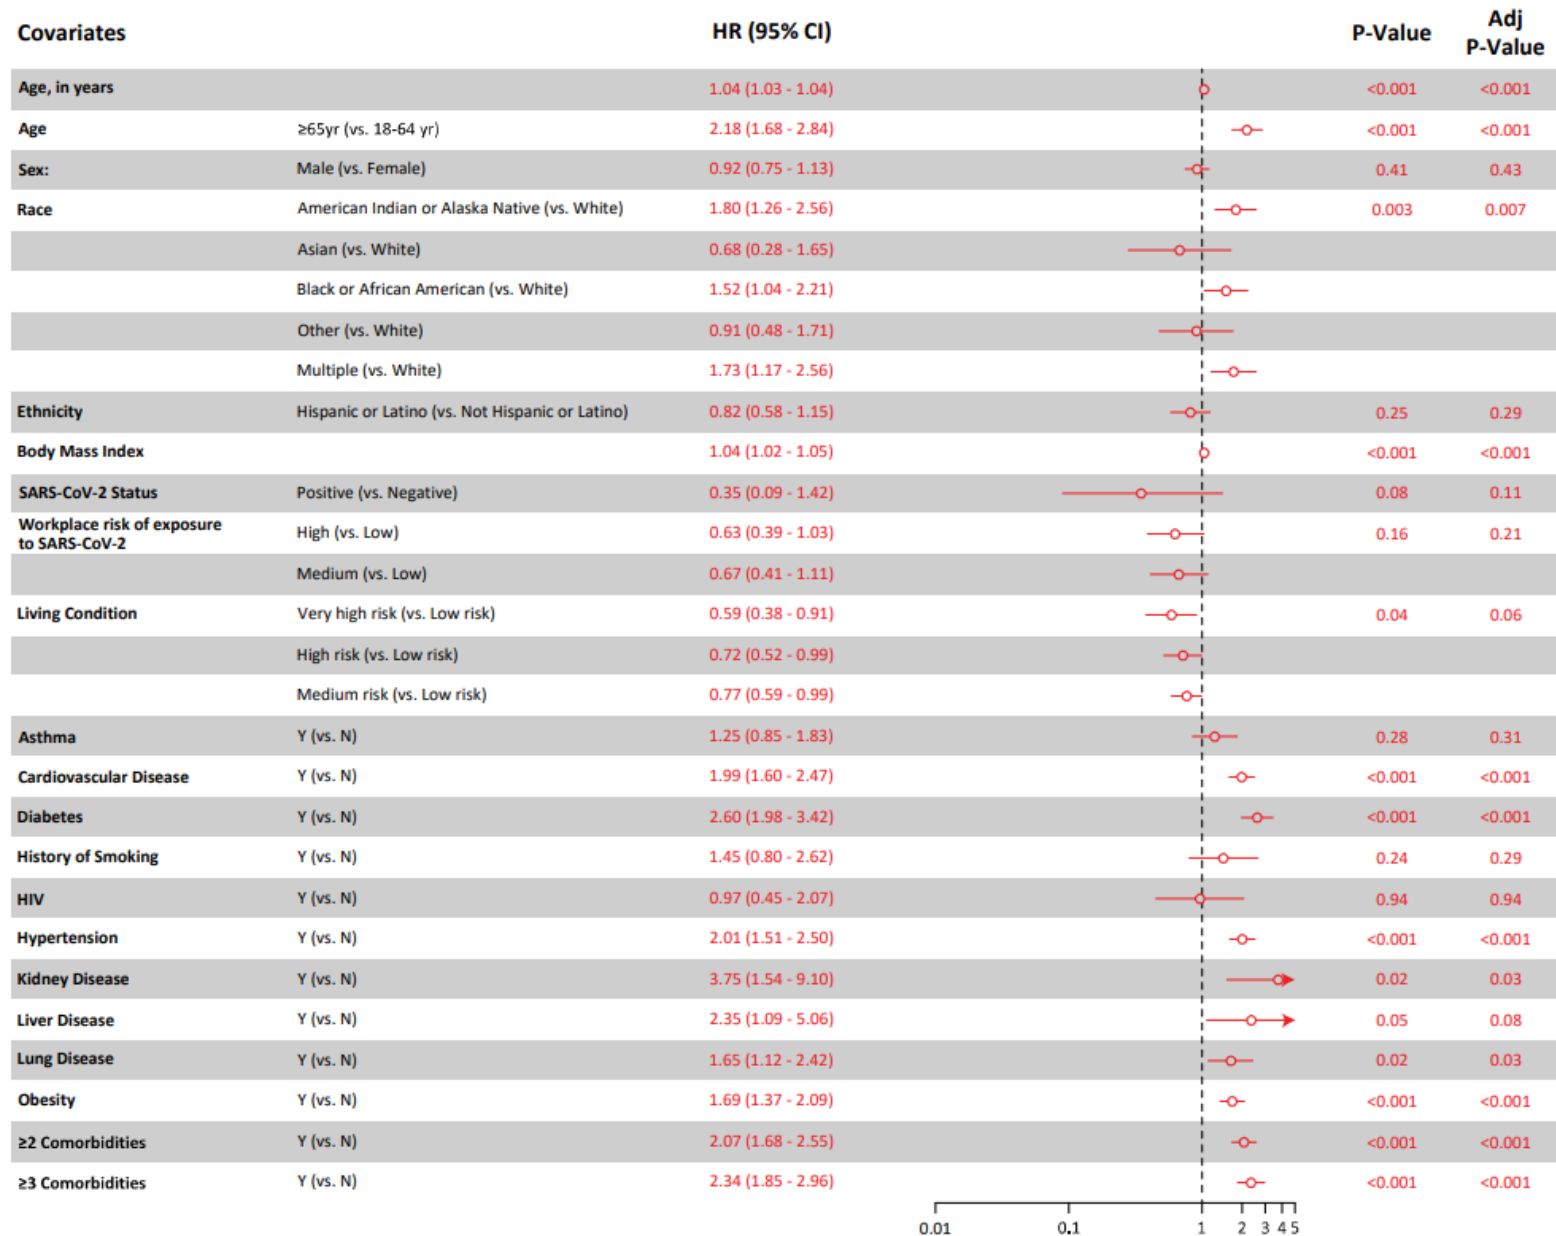

**eFigure 6: Multivariate Cox Proportional Hazard Regression Model for the Severe COVID-19 Endpoint among Participants with COVID-19.**

All models adjusted for study (Moderna, AstraZeneca, Janssen, Novavax), Region (South America, North America, South Africa) and calendar time to account for potentially different baseline hazard functions across studies, regions, and time. Multivariate hazard estimates for the co-primary endpoint Severe COVID-19 among participants with COVID-19 are shown. The model was produced via Akaike information criterion in a stepwise algorithm. P-values ≤ 0.01 were considered statistically significant.

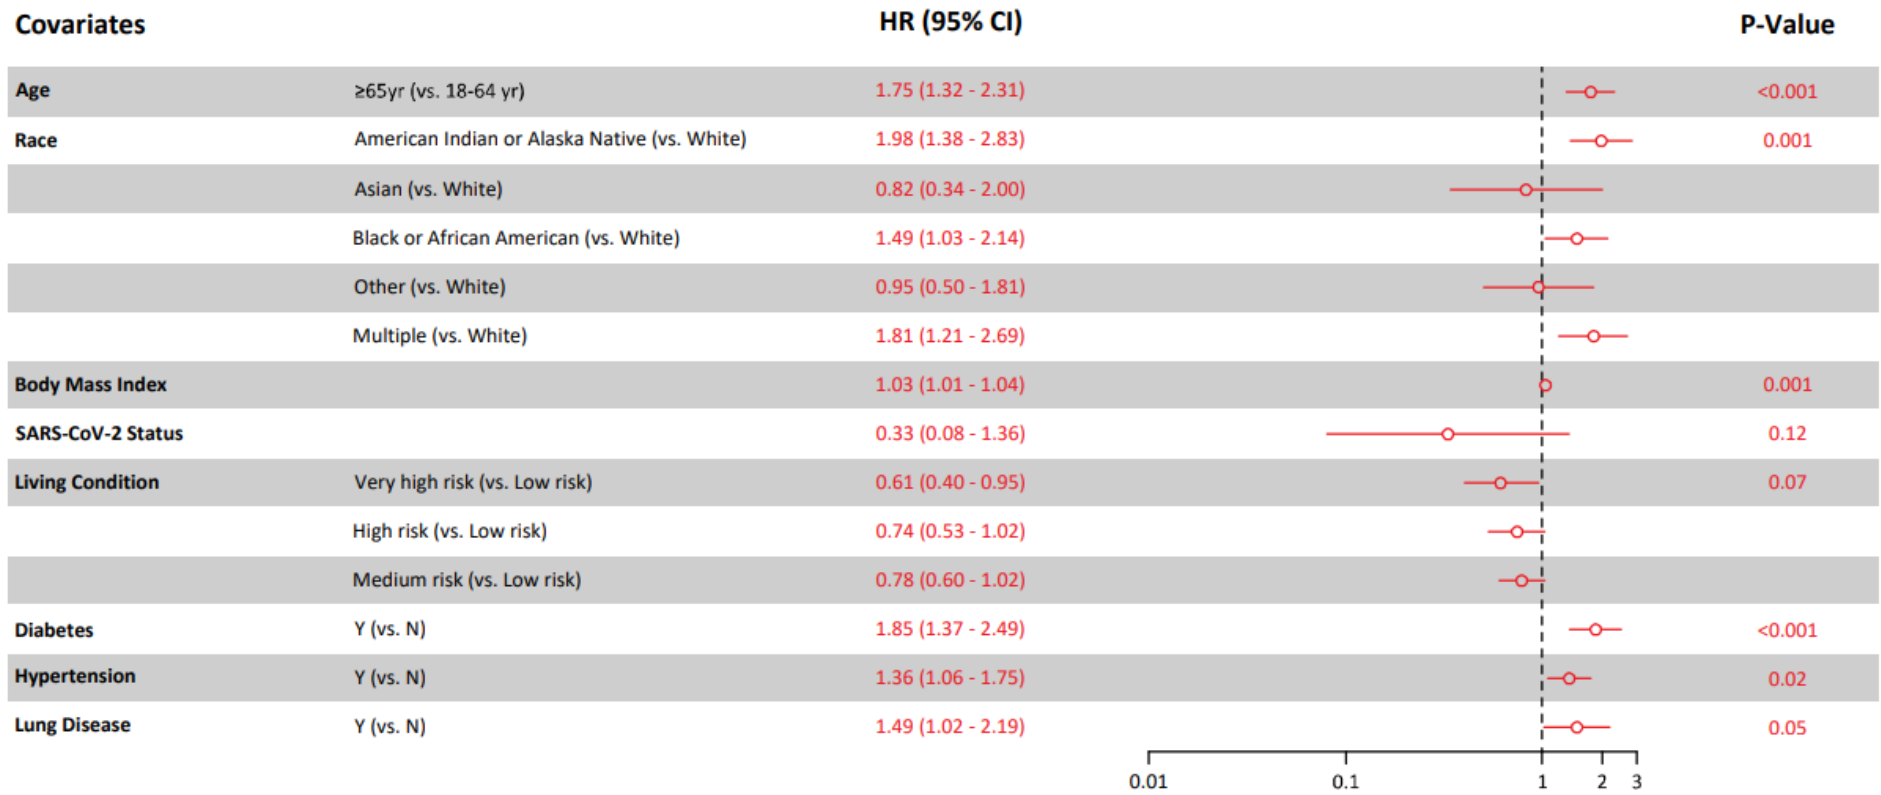

**eFigure 7: Univariate Cox Proportional Hazard Regression Model for the COVID-19 Endpoint among Participants with SARS-CoV-2.**

All models adjusted for study (Moderna, AstraZeneca, Janssen, Novavax), Region (South America, North America, South Africa) and calendar time to account for potentially different baseline hazard functions across studies, regions, and time. Univariate hazard estimates for the co-primary endpoint COVID-19 among participants with SARS-CoV-2 are shown. The  $\geq 3$  Comorbidities and  $\geq 4$  Comorbidities variables were not considered for inclusion in the multivariate analysis. Unadjusted and adjusted P-values are shown. P-values  $\leq 0.01$  were considered statistically significant.

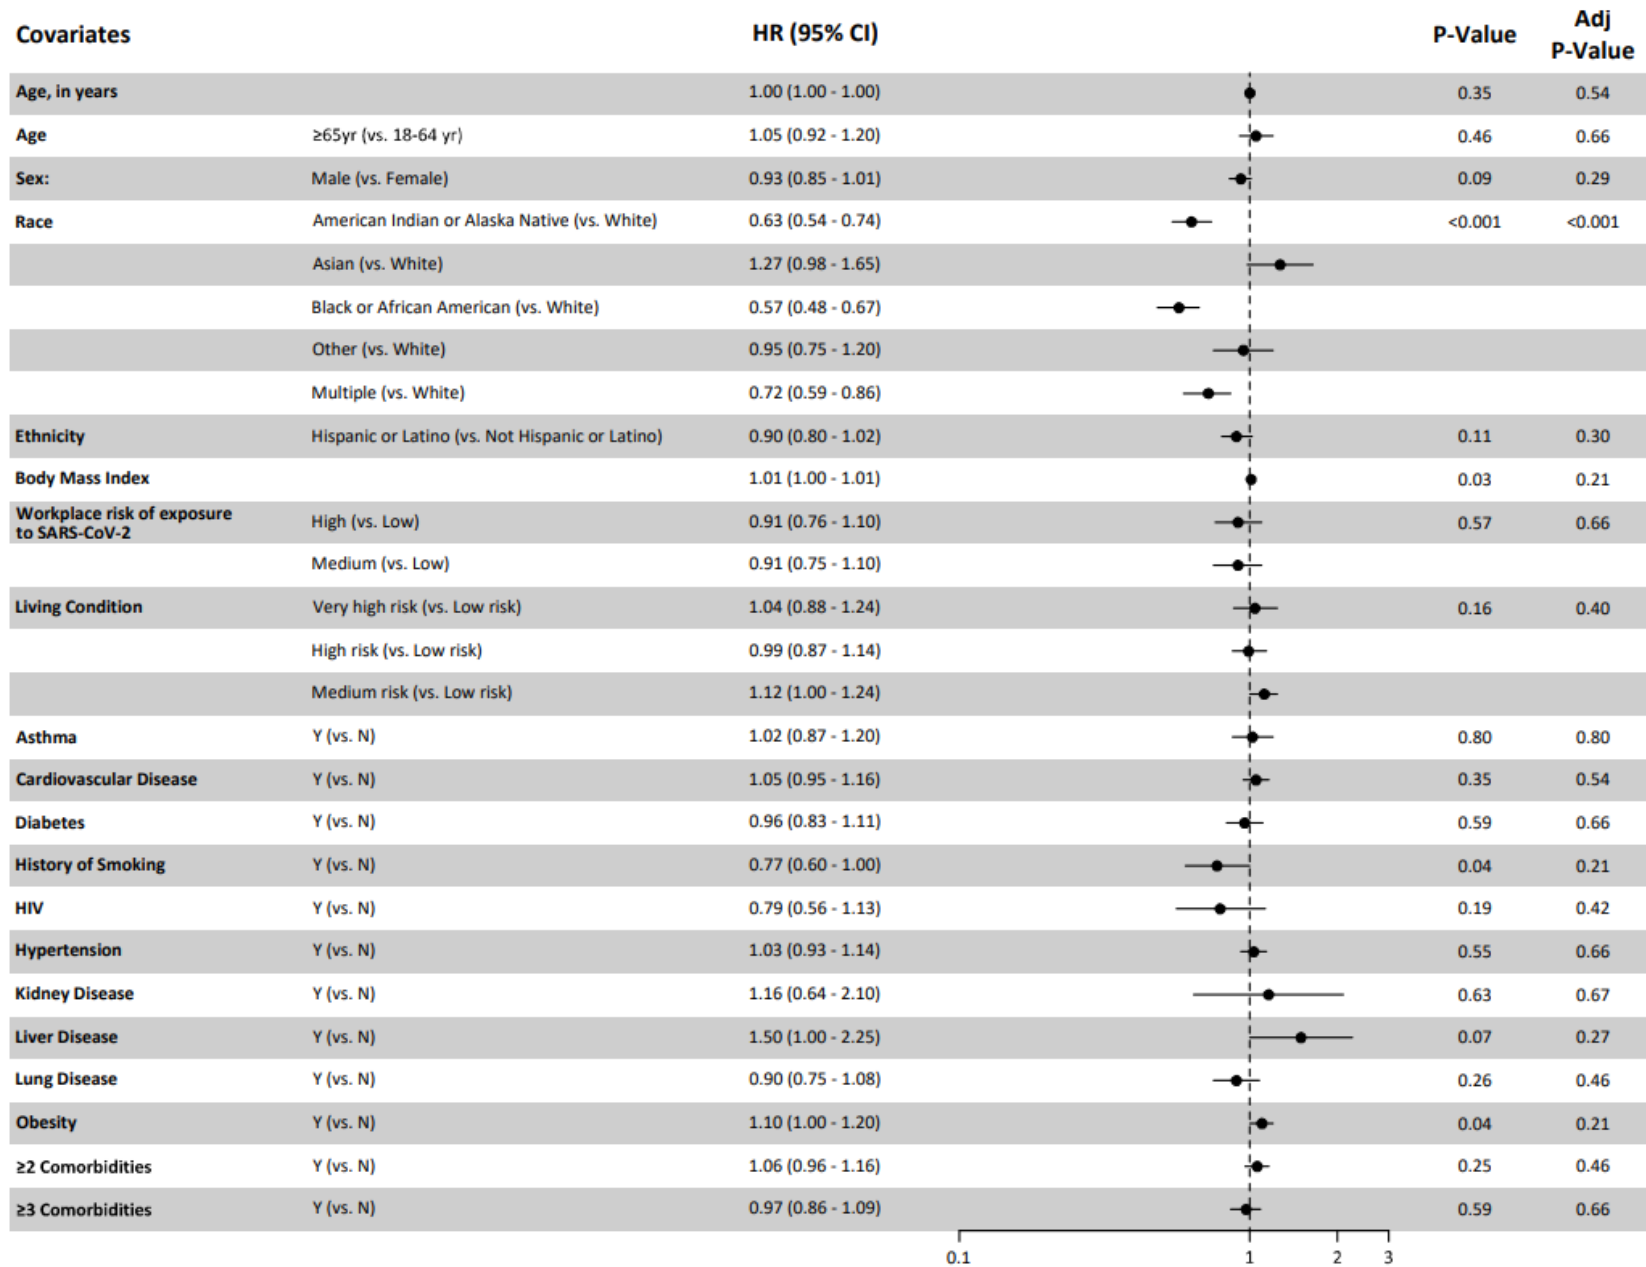

**eFigure 8: Multivariate Cox Proportional Hazard Regression Model for the COVID-19 Endpoint among Participants with SARS-CoV-2.**

All models adjusted for study (Moderna, AstraZeneca, Janssen, Novavax), Region (South America, North America, South Africa) and calendar time to account for potentially different baseline hazard functions across studies, regions, and time. Multivariate hazard estimates for the co-primary endpoint COVID-19 among participants with SARS-CoV-2 are shown. The model was produced via Akaike information criterion in a stepwise algorithm. P-values  $\leq 0.01$  were considered statistically significant.

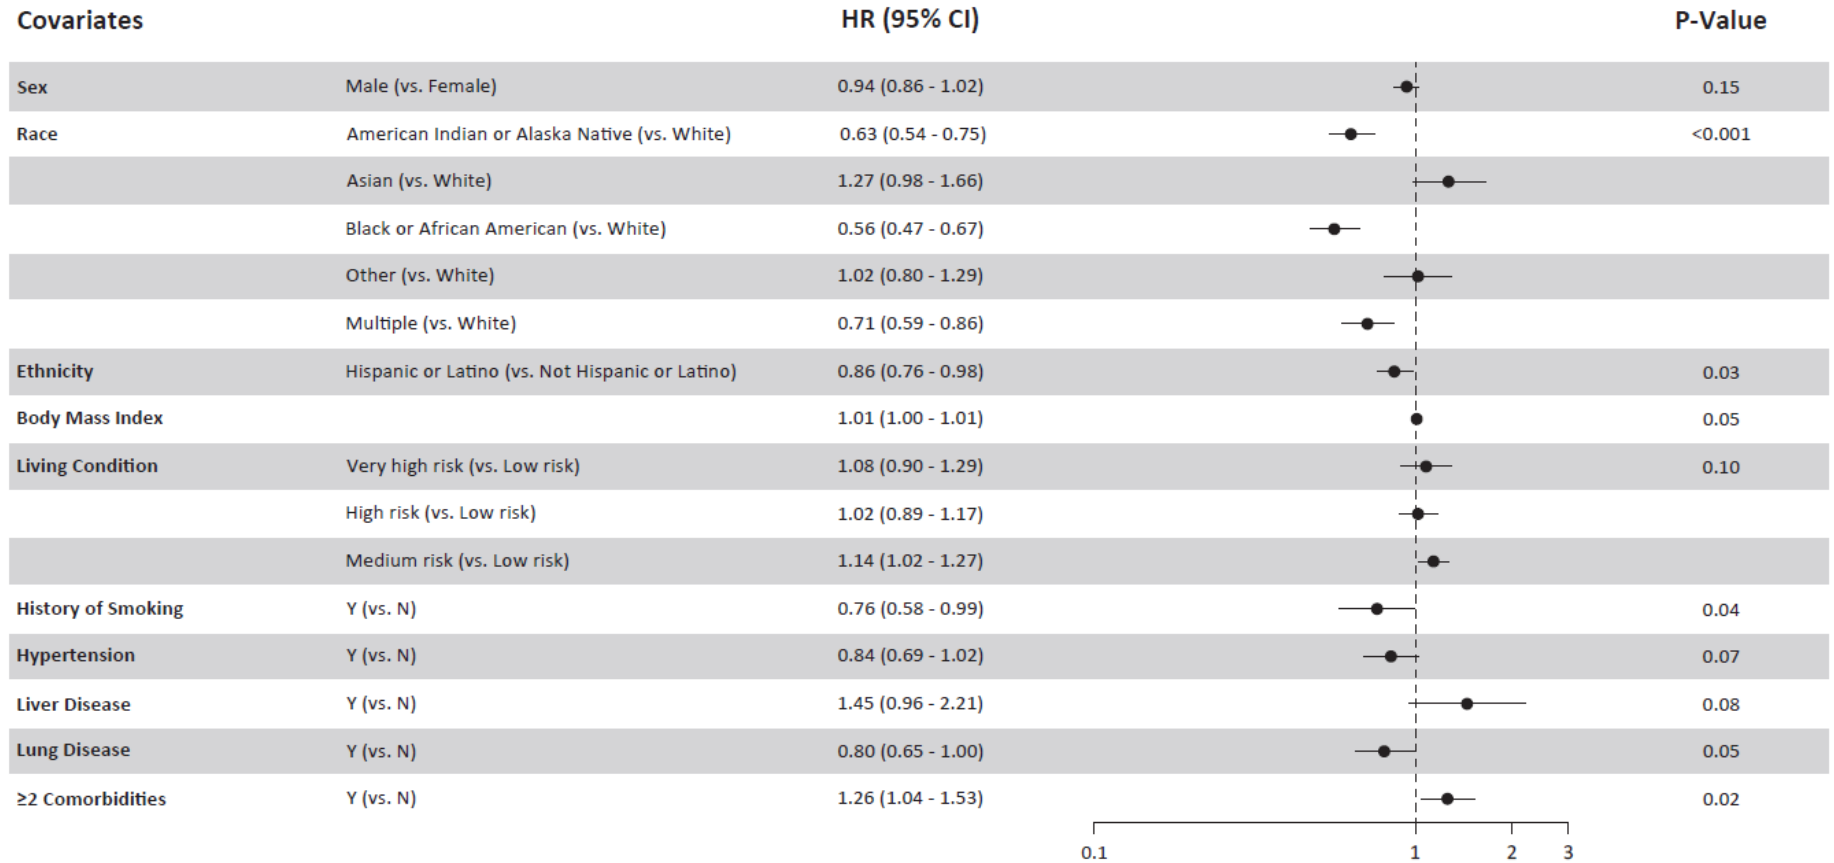

### eFigure 9: Multivariate Cox Proportional Hazard Regression Models with Two-Way Interaction Terms for the COVID-19 Endpoint.

Two-way interaction terms were included in the Cox models via a cross-product term of the two covariates of interest. The Multivariate Cox model of COVID-19 with two-way interactions for age, ethnicity was chosen by Akaike information criterion, while keeping only interaction terms with a p-value <0.01. Not all variables that were significant in the univariate analysis were included in the multivariate model. P-values ≤ 0.01 for the adjusted hazard ratios were considered statistically significant.

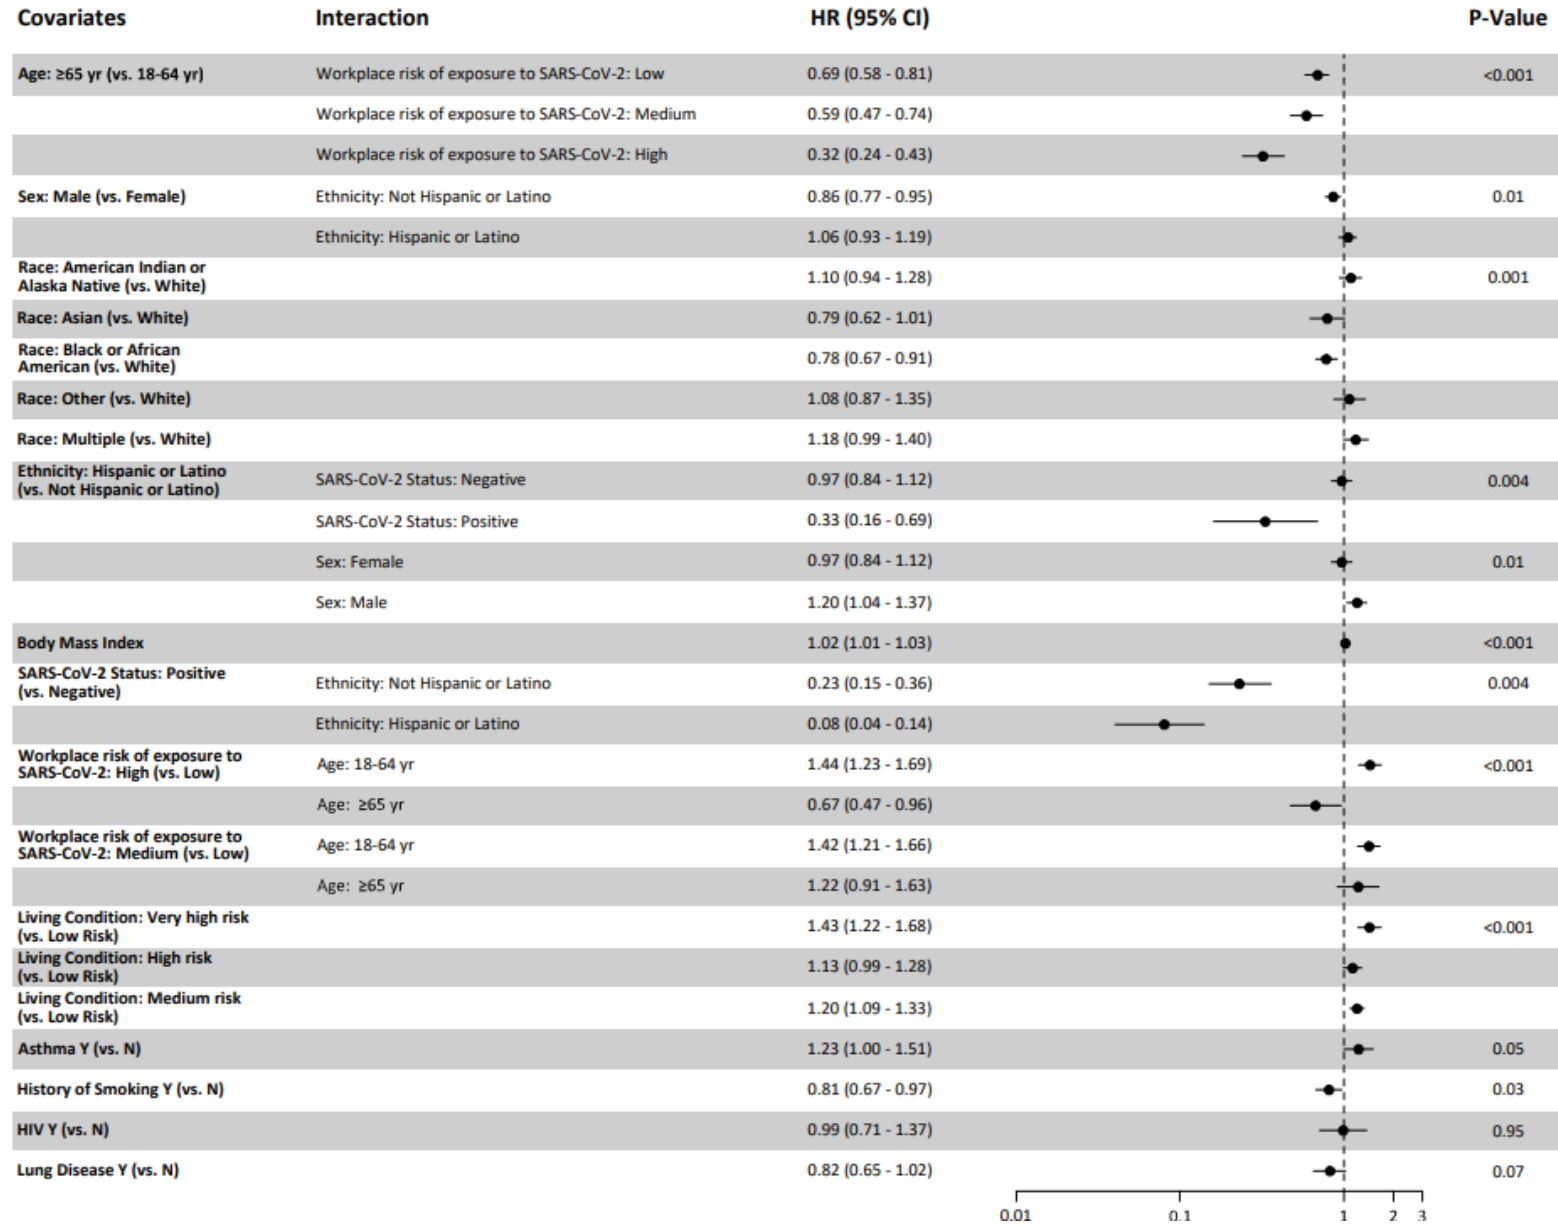

**eTable 1. Study Case Definitions.**

|                    | Case Definition                                                                                                                                                                                                                                                                                                                                                                                                                                                                                                                                       |                                                                                                                                                                                                                                                                                                                                                                                                                                                                                                                                                                                                                                                                                                                         |
|--------------------|-------------------------------------------------------------------------------------------------------------------------------------------------------------------------------------------------------------------------------------------------------------------------------------------------------------------------------------------------------------------------------------------------------------------------------------------------------------------------------------------------------------------------------------------------------|-------------------------------------------------------------------------------------------------------------------------------------------------------------------------------------------------------------------------------------------------------------------------------------------------------------------------------------------------------------------------------------------------------------------------------------------------------------------------------------------------------------------------------------------------------------------------------------------------------------------------------------------------------------------------------------------------------------------------|
|                    | COVID-19                                                                                                                                                                                                                                                                                                                                                                                                                                                                                                                                              | Severe COVID-19                                                                                                                                                                                                                                                                                                                                                                                                                                                                                                                                                                                                                                                                                                         |
| <b>Moderna</b>     | PCR-confirmed SARS-CoV-2 infection AND one of the following: cough, shortness of breath or difficulty breathing, or clinical or radiological evidence of pneumonia; OR two of the following: fever ( $\geq 38^{\circ}$ C), chills, myalgia, headache, sore throat, or new anosmia or ageusia.                                                                                                                                                                                                                                                         | Confirmed COVID-19 as per the Primary Efficacy Endpoint case definition, plus any of the following: clinical signs indicative of severe systemic illness (respiratory rate $\geq 30$ per minute, heart rate $\geq 125$ beats per minute, SpO <sub>2</sub> $\leq 93\%$ on room air at sea level or PaO <sub>2</sub> /FIO <sub>2</sub> $< 300$ mm Hg); respiratory failure or ARDS, (defined as needing high-flow oxygen, non-invasive or mechanical ventilation, or extracorporeal membrane oxygenation); evidence of shock (systolic blood pressure $< 90$ mmHg, diastolic BP $< 60$ mmHg or requiring vasopressors); significant acute renal, hepatic or neurologic dysfunction; admission to an ICU; or death.        |
| <b>AstraZeneca</b> | PCR-confirmed SARS-CoV-2 infection AND one of the following: new or worsening dyspnea/shortness of breath, pneumonia diagnosed by chest X-ray or computed tomography scan, or oxygen saturation $\leq 94\%$ on room air or requiring either new initiation or escalation in supplemental O <sub>2</sub> ; OR two of the following: fever, new/worsening cough, myalgia, fatigue that interferes with activities of daily living, vomiting and/or diarrhea, or anosmia and/or ageusia.                                                                 | SARS-CoV-2 RT-PCR-positive symptomatic illness plus any of the following: clinical signs at rest indicative of severe systemic illness (respiratory rate $\geq 30$ breaths per minute, heart rate $\geq 125$ beats per minute, oxygen saturation $\leq 93\%$ on room air at sea level, or PaO <sub>2</sub> /FIO <sub>2</sub> $< 300$ mm Hg); respiratory failure (defined as needing high-flow oxygen, noninvasive ventilation, mechanical ventilation or extracorporeal membrane oxygenation); evidence of shock (systolic blood pressure $< 90$ mm Hg, diastolic blood pressure $< 60$ mm Hg, or requiring vasopressors); significant acute renal, hepatic, or neurologic dysfunction; admission to an ICU; or death. |
| <b>Janssen</b>     | PCR or NAAT confirmation of SARS-CoV-2 infection AND $\geq 2$ of the following symptoms (new or worsening): fever or chills, cough, heart rate $\geq 90$ beats/minute, muscle or body pain, headache, new loss of taste or smell, sore throat, red or bruised-looking feet or toes, nausea, vomiting, or diarrhea; or one or more of the following signs or symptoms: shortness of breath, respiratory rate $> 20$ breaths/minute, clinical or radiologic evidence of pneumonia, deep vein thrombosis, or abnormal oxygen saturation (but above 93%). | SARS-CoV-2 RT-PCR-positive symptomatic illness with any of the following: respiratory failure; evidence of shock (systolic blood pressure $< 90$ mm Hg, diastolic blood pressure $< 60$ mm Hg, or requiring vasopressors); respiratory rate $> 30$ breaths/minute; heart rate $\geq 125$ beats/minute; oxygen saturation of 93% or less (ambient air at sea level), or a ratio of the partial pressure of oxygen to the fraction of inspired oxygen $< 300$ mm Hg; intensive care unit admission; significant acute renal, hepatic, or neurologic dysfunction; or death.                                                                                                                                                |

|                |                                                                                                                                                                                                                                                                                                                                                                                                                                                                                                                                                                                                                                                                                                                                                                                                                                                                                                                                                                                                                                                               |                                                                                                                                                                                                                                                                                                                                                                                                                                                                                                                                                                                                                                                                                                                                                                                                                                                                                                                                                                                                                                                                                                                                                                                                         |
|----------------|---------------------------------------------------------------------------------------------------------------------------------------------------------------------------------------------------------------------------------------------------------------------------------------------------------------------------------------------------------------------------------------------------------------------------------------------------------------------------------------------------------------------------------------------------------------------------------------------------------------------------------------------------------------------------------------------------------------------------------------------------------------------------------------------------------------------------------------------------------------------------------------------------------------------------------------------------------------------------------------------------------------------------------------------------------------|---------------------------------------------------------------------------------------------------------------------------------------------------------------------------------------------------------------------------------------------------------------------------------------------------------------------------------------------------------------------------------------------------------------------------------------------------------------------------------------------------------------------------------------------------------------------------------------------------------------------------------------------------------------------------------------------------------------------------------------------------------------------------------------------------------------------------------------------------------------------------------------------------------------------------------------------------------------------------------------------------------------------------------------------------------------------------------------------------------------------------------------------------------------------------------------------------------|
| <b>Novavax</b> | PCR-confirmed COVID-19, either mild ( $\geq 1$ of the following: subjective or objective fever or new onset cough; or $\geq 2$ of the following: new onset or worsening of shortness of breath or difficulty breathing compared to baseline, new onset fatigue, new onset generalized muscle or body aches, new onset headache, new loss of taste or smell, acute onset of sore throat, congestion or runny nose, new onset nausea, vomiting or diarrhea) OR moderate ( $\geq 1$ of the following: fever $\geq 38.4^{\circ}\text{C}$ for $\geq 3$ days, any evidence of significant lower respiratory tract infection [shortness of breath or breathlessness or difficulty breathing with or without exertion greater than baseline], tachypnea [24 to 29 breaths per minute at rest], SpO <sub>2</sub> 94% to 95% on room air, abnormal chest X-ray or chest computerized tomography consistent with pneumonia or lower respiratory tract infection, adventitious sounds on lung auscultation [e.g., crackles/rales, wheeze, rhonchi, pleural rub, stridor]. | SARS-CoV-2 RT-PCR positive symptomatic illness with any of the following: clinical signs at rest indicative of severe systemic illness (respiratory rate $\geq 30$ breaths/minute, heart rate $\geq 125$ beats/minute, SpO <sub>2</sub> $\leq 93\%$ on room air at sea level, or PaO <sub>2</sub> /FiO <sub>2</sub> $< 300$ mmHg); respiratory failure (defined as needing high-flow oxygen, non-invasive ventilation, mechanical ventilation, or extracorporeal membrane oxygenation); one or more major organ system dysfunction or failure to be defined by diagnostic testing/clinical syndrome/interventions, including ARDS, acute renal failure, acute hepatic failure, acute right or left heart failure; septic or cardiogenic shock (with shock defined as systolic blood pressure $< 90$ mm Hg OR diastolic blood pressure $< 60$ mm Hg); acute stroke (ischemic or hemorrhagic), acute thrombotic event (acute myocardial infarction, deep vein thrombosis, pulmonary embolism); requirement for: vasopressors, systemic corticosteroids, or hemodialysis; multisystem inflammatory syndrome in children as per the CDC definition (in participants $< 21$ years), ICU admission; or death. |
| <b>FDA</b>     | Virologically confirmed SARS-CoV-2 infection with one or more of the following symptoms: fever or chills, cough, shortness of breath or difficulty breathing, fatigue, muscle or body aches, headache, new loss of taste or smell, sore throat, congestion or runny nose, nausea or vomiting, or diarrhea.                                                                                                                                                                                                                                                                                                                                                                                                                                                                                                                                                                                                                                                                                                                                                    | Virologically confirmed SARS-CoV-2 infection with any of the following: Clinical signs at rest indicative of severe systemic illness (respiratory rate $\geq 30$ per minute, heart rate $\geq 125$ per minute, SpO <sub>2</sub> $\leq 93\%$ on room air at sea level or PaO <sub>2</sub> /FiO <sub>2</sub> $< 300$ mm Hg); respiratory failure (defined as needing high-flow oxygen, noninvasive ventilation, mechanical ventilation or extracorporeal membrane oxygenation); evidence of shock (SBP $< 90$ mm Hg, DBP $< 60$ mm Hg, or requiring vasopressors); significant acute renal, hepatic, or neurologic dysfunction; admission to an ICU; or death.                                                                                                                                                                                                                                                                                                                                                                                                                                                                                                                                            |

Abbreviations: PCR, polymerase chain reaction; NAAT, nucleic acid amplification test; FDA, US Food and Drug Administration; ARDS, Acute Respiratory Distress Syndrome; PaO<sub>2</sub>/FiO<sub>2</sub>, partial pressure of oxygen to fraction of inspired oxygen ratio; ICU, Intensive Care Unit. Participants meeting the severe COVID-19 case definition were included in the COVID-19 primary endpoint.

**eTable 2: Schedule of Anti-Nucleocapsid Protein Testing Across Protocols.** Planned testing is shown through week 30 of the studies. Ranges are given for later timepoints to account for slight differences in the individual trials. Only data from samples accrued through the blinded, pre-crossover phases of the trials are included in this analysis. Participants were screened for symptomatic illness by passive surveillance and active surveillance at all study visits. In Moderna, routine non-symptom-driven SARS-CoV-2 PCR testing was performed at week 0, week 4, and at the Participant Decision Visit (this visit provided the opportunity for participants to be unblinded following Emergency Use Authorization (EUA) of COVID-19 vaccines). In Novavax, routine non-symptom-driven SARS-CoV-2 PCR testing was performed at week 0 and at the time of blinded crossover following EUA submission.

| Study              | Scheduled, per protocol, by study week |                |     |                |   |    |       |       |     | Unblinding or Crossover Visit Testing |
|--------------------|----------------------------------------|----------------|-----|----------------|---|----|-------|-------|-----|---------------------------------------|
|                    | 0                                      | 2              | 4-5 | 6              | 8 | 10 | 12-13 | 24-26 | 30  |                                       |
| <b>Moderna</b>     | x                                      |                | x   |                | x |    |       |       | x   | x                                     |
| <b>AstraZeneca</b> | x                                      | x <sup>a</sup> | x   | x <sup>a</sup> | x |    | x     | x     |     |                                       |
| <b>Janssen</b>     | x                                      |                | x   |                |   | x  |       | x     |     | x                                     |
| <b>Novavax</b>     | x                                      |                | x   |                |   |    | x     | N/A   | N/A | x                                     |

<sup>a</sup>Substudy participants only, n=3000.



**eTable 3: CDC Risk Factors for Severe Disease.**

| CDC Category   | Condition                      | Sub-condition | Supporting Literature                                                                                                                                                                                                                                                                                                                                                                                                                                                                                                                                                                                                                                                                                                                      | Decision to Include | MedDRA term (Version 24.0)                                                                                                                                                                                    |
|----------------|--------------------------------|---------------|--------------------------------------------------------------------------------------------------------------------------------------------------------------------------------------------------------------------------------------------------------------------------------------------------------------------------------------------------------------------------------------------------------------------------------------------------------------------------------------------------------------------------------------------------------------------------------------------------------------------------------------------------------------------------------------------------------------------------------------------|---------------------|---------------------------------------------------------------------------------------------------------------------------------------------------------------------------------------------------------------|
| Mixed evidence | Alpha 1 antitrypsin deficiency |               | CDC systematic review of 6 studies, inconclusive for mortality/ICU/intubation/ventilation/hospitalization, insufficient to assess confounding                                                                                                                                                                                                                                                                                                                                                                                                                                                                                                                                                                                              | Yes                 | Alpha-1 antitrypsin deficiency (PT 10083869)                                                                                                                                                                  |
| Mixed evidence | Asthma                         |               | Meta-analysis, review, cohort studies without clear direction of association                                                                                                                                                                                                                                                                                                                                                                                                                                                                                                                                                                                                                                                               | Yes                 | Asthma (PT 10003553)<br>Childhood asthma (PT 10081274)<br>Asthma late onset (PT 10003559)<br>Occupational asthma (PT 10070836)<br>Cough variant asthma (PT 10063076)<br>Asthma exercise induced (PT 10003557) |
| Mixed evidence | Bronchopulmonary dysplasia     |               | CDC systematic review found 1 relevant study, descriptive cohort of 185 peds inpatients: among 9 with bronchopulmonary dysplasia, no deaths, 2/9 ICU admit, 4/9 noninvasive ventilation                                                                                                                                                                                                                                                                                                                                                                                                                                                                                                                                                    | Yes                 | Bronchopulmonary dysplasia (PT 10006475)                                                                                                                                                                      |
| Higher risk    | Cancer                         |               | Meta-analysis (n=18k pts with COVID + cancer with search terms "cancer" "tumor" "malignancy" "neoplasia" through Jul 2020) generated pooled CFR of 25%; meta-analysis found "malignancy" OR 2.7 for composite severe outcomes (2.8 for severe disease, 1.7 for ICU, 3.2 for mortality); meta-analysis of 181k COVID pts (23k with cancer with search term "tumor OR cancer OR malignancy OR neoplasm") found OR 2.5 for death, higher in hematologic malignancy and lung cancer; prospective cohort n=800 with cancer + COVID through Apr 2020 found 28% mortality, not associated with cancer therapy; prospective cohort of 928 pts with cancer + COVID through Apr 2020 found 13% mortality, associated with active cancer vs remission | Yes                 | Neoplasms malignant site unspecified (HLT 10029105), neoplasm malignant (PT 10028997), neoplasm (PT 10028980)                                                                                                 |
| Higher risk    | Cerebrovascular disease        |               | Meta-analysis (n=4k COVID pts) suggests cerebrovascular disease (search terms "cerebrovascular disease" "stroke" "brain infarction") associated with composite mortality + severe COVID (RR 2.0); separate analysis of 65k COVID pts suggests cerebrovascular disease (term "cerebrovascular disorders" and "stroke") associated with mortality (RR 2.2 but CI includes null); review from early in pandemic suggests cerebrovascular disease associated with mortality (RR 3.3); cohort                                                                                                                                                                                                                                                   | Yes                 | Cerebrovascular disorder (PT 10008196)                                                                                                                                                                        |

| CDC Category | Condition              | Sub-condition                     | Supporting Literature                                                                                                                                                                                                                                                                                     | Decision to Include | MedDRA term (Version 24.0)                                                                                                                                                               |
|--------------|------------------------|-----------------------------------|-----------------------------------------------------------------------------------------------------------------------------------------------------------------------------------------------------------------------------------------------------------------------------------------------------------|---------------------|------------------------------------------------------------------------------------------------------------------------------------------------------------------------------------------|
|              |                        |                                   | n=1590 suggests associated with mortality (HR 3.1, CI 1.1-8.9)                                                                                                                                                                                                                                            |                     |                                                                                                                                                                                          |
| Higher risk  | Chronic kidney disease |                                   | Meta-analysis (n=27k COVID pts) found renal diseases (including Cr >1.1 or 1.3, also urinary tract issues such as infection, kidney stone, prostate disease) associated with COVID death. Large UK cohort found increased HR for COVID death with decreasing GFR (HR>2 for GFR<30) and with ESRD (HR 3.7) | Yes                 | Chronic kidney disease (PT 10064848)                                                                                                                                                     |
|              | Chronic liver disease  |                                   |                                                                                                                                                                                                                                                                                                           |                     |                                                                                                                                                                                          |
| Higher risk  | Chronic liver disease  | Alcoholic liver disease           | Limited (CDC systematic review found 1 study, n=1701): alcoholic liver disease associated with increased risk of mortality vs no liver disease                                                                                                                                                            | Yes                 | Alcoholic liver disease (PT 10001627) Fatty liver alcoholic (PT 10016262)                                                                                                                |
| Higher risk  | Chronic liver disease  | Autoimmune hepatitis              | Limited (CDC systematic review found 1 study, n=1701): propensity score matching indicates AIH may be associated with increased risk of severe outcomes including mortality, ICU, ventilation, but CI included the null                                                                                   | Yes                 | Autoimmune hepatitis (PT 10003827), Hepatic autoimmune disorders (HLT 10003820)                                                                                                          |
| Higher risk  | Chronic liver disease  | Cirrhosis                         | (CDC systematic review of 64 cohort and case/control): cirrhosis associated with increased risk of mortality & hospitalization vs no cirrhosis                                                                                                                                                            | Yes                 | Hepatic cirrhosis (PT 10019641)                                                                                                                                                          |
| Higher risk  | Chronic liver disease  | Non-alcoholic fatty liver disease | CDC systematic review: NAFLD not associated with mortality. Possible increased risk ICU admission (4 studies) and mechanical ventilation (1 study)                                                                                                                                                        | Yes                 | Nonalcoholic fatty liver disease (PT 10082249)                                                                                                                                           |
| Higher risk  | Chronic liver disease  | not specified                     | CDC systematic review of 64 cohort and case/control: any chronic liver disease associated with increased mortality, ICU admission, intubation, ventilation, hospitalization                                                                                                                               | Yes                 | Liver disorder (PT 10024670) Hepatic and hepatobiliary disorders NEC (HLT 10027681) Hepatic fibrosis and cirrhosis (HLT 10019669) Hepatocellular damage and hepatitis NEC (HLT 10019833) |
|              | Chronic lung disease   |                                   |                                                                                                                                                                                                                                                                                                           | Yes                 | Chronic respiratory disease (PT 10061768) Respiratory tract disorders (HLT 10024974) Bronchospasm and obstruction (HLT 10006484) Parenchymal lung disorders (HLT 10033979)               |

| <b>CDC Category</b> | <b>Condition</b>     | <b>Sub-condition</b>                         | <b>Supporting Literature</b>                                                                                                                                                                                                                                                                                    | <b>Decision to Include</b> | <b>MedDRA term (Version 24.0)</b>                                                                                                                                                                                                                              |
|---------------------|----------------------|----------------------------------------------|-----------------------------------------------------------------------------------------------------------------------------------------------------------------------------------------------------------------------------------------------------------------------------------------------------------------|----------------------------|----------------------------------------------------------------------------------------------------------------------------------------------------------------------------------------------------------------------------------------------------------------|
| Higher risk         | Chronic lung disease | Bronchiectasis                               | CDC systematic review of 4 cohort studies: suggest increased risk of mortality (inconsistent) and ICU admission (CI included null). 1 study suggested increased risk of hospitalization                                                                                                                         | Yes                        | Bronchiectasis (PT 10006445)<br>Congenital bronchiectasis (PT 10010391)                                                                                                                                                                                        |
| Higher risk         | Chronic lung disease | COPD (chronic obstructive pulmonary disease) | Meta-analysis (n=1592 COVID pts) suggests COPD associated with severe disease (OR 5.7); meta-analysis (n=39k hospitalized COVID pts) suggests associated with severe disease (RR 1.7) and death (RR 2.0); meta-analysis (n=26k COVID pts) suggests associated with severe outcomes (pooled effect estimate 1.5) | Yes                        | Chronic obstructive pulmonary disease (PT 10009033)<br>Asthma-chronic obstructive pulmonary disease overlap (PT 10077005)<br>Obstructive airways disorder (PT 10061877)                                                                                        |
| Higher risk         | Chronic lung disease | Interstitial lung disease                    | CDC systematic review of 7 cohort and 1 modeling study: suggest increased mortality, ICU admission. This is true for idiopathic pulm fibrosis (IPF) and sarcoid. Hypersensitivity pneumonitis and other ILD also associated with mortality and hospitalization                                                  | Yes                        | Interstitial lung disease (PT 10022611)<br>Idiopathic pulmonary fibrosis (PT 10021240)<br>Pulmonary fibrosis (PT 10037383)<br>idiopathic pulmonary fibrosis (PT 10021240)<br>Pulmonary sarcoidosis (PT 10037430)<br>Hypersensitivity pneumonitis (PT 10081988) |
| Higher risk         | Chronic lung disease | Pulmonary embolism                           | CDC systematic review found 1 cohort study which suggests history of PE is associated with mortality                                                                                                                                                                                                            | Yes                        | Pulmonary embolism (PT 10037377)<br>Pulmonary thrombosis (PT 10037437)<br>Pulmonary artery thrombosis (PT 10037340)                                                                                                                                            |
| Higher risk         | Chronic lung disease | Pulmonary hypertension                       | CDC systematic review of 3 cohort studies: suggests Pulm HTN associated with increased mortality, ICU admission, hospitalization                                                                                                                                                                                | Yes                        | Pulmonary hypertension (HLT 10037401) (PT pulmonary hypertension10037400, pulmonary arterial hypertension10064911, pulmonary venous hypertension10085364)                                                                                                      |
| Higher risk         | Cystic fibrosis      |                                              | Series (n=181 registry pts with CF including 32 post-transplant) through Jun 2020 reported 6% ICU admission, 3.8% mortality; series (n=40 registry pts with CF including 11 post-transplant) through Apr 2020 reported 10% ICU admission, 3% invasive ventilation, 0 deaths                                     | Yes                        | Cystic fibrosis, Cystic fibrosis lung (PT 10011762, PT 10011763)                                                                                                                                                                                               |
| Higher risk         | Diabetes mellitus    |                                              |                                                                                                                                                                                                                                                                                                                 | Yes                        | Diabetes mellitus (incl subtypes) (HLT 10012602)<br>Hyperglycemic conditions NEC (HLT 10020638)                                                                                                                                                                |
| Higher risk         | Diabetes mellitus    | type 1                                       | Large cohort study (263k w/DM1, >2 million with DM2) found associated with COVID-related death (OR of 2.8 and 1.8). Smaller study (40 with DM1,                                                                                                                                                                 | Yes                        | Type 1 diabetes mellitus (PT 10067584)                                                                                                                                                                                                                         |

| CDC Category | Condition         | Sub-condition                                            | Supporting Literature                                                                                                                                                                                   | Decision to Include | MedDRA term (Version 24.0)                                                                                                                                                                                                                                                                                                                                                       |
|--------------|-------------------|----------------------------------------------------------|---------------------------------------------------------------------------------------------------------------------------------------------------------------------------------------------------------|---------------------|----------------------------------------------------------------------------------------------------------------------------------------------------------------------------------------------------------------------------------------------------------------------------------------------------------------------------------------------------------------------------------|
|              |                   |                                                          | 273 with DM2) found associated with hospitalization and severe disease                                                                                                                                  |                     |                                                                                                                                                                                                                                                                                                                                                                                  |
| Higher risk  | Diabetes mellitus | type 2                                                   | Other cohort studies find pre-existing, new dx, and hyperglycemia on admission associated with severe outcomes. Meta-analysis (n=438k pregnant pts) finds gestational DM associated with severe disease | Yes                 | Type 2 diabetes mellitus (PT 10067585), Insulin requiring type 2 diabetes mellitus (PT 10053247)                                                                                                                                                                                                                                                                                 |
| Higher risk  | Disability        | Attention-Deficit/Hyperactivity Disorder (ADHD)          | CDC systematic review for disabilities (pending per website)                                                                                                                                            | Yes                 | Attention deficit hyperactivity disorder (PT 10083622) Atypical attention deficit syndrome (PT 10003746)                                                                                                                                                                                                                                                                         |
| Higher risk  | Disability        | Cerebral Palsy                                           |                                                                                                                                                                                                         | Yes                 | Cerebral palsy (PT 10008129) Acquired cerebral palsy (PT 10084737)                                                                                                                                                                                                                                                                                                               |
| Higher risk  | Disability        | Congenital Malformations (Birth Defects)                 |                                                                                                                                                                                                         | Yes                 | Congenital anomaly (PT 10010356)                                                                                                                                                                                                                                                                                                                                                 |
| Higher risk  | Disability        | Intellectual and Developmental Disabilities              |                                                                                                                                                                                                         | Yes                 | Intellectual disabilities (HLT 10077548) Developmental disorders cognitive (HLT 10012561) Pervasive developmental disorders NEC (HLT 10034740)                                                                                                                                                                                                                                   |
| Higher risk  | Disability        | Learning Disabilities                                    |                                                                                                                                                                                                         | Yes                 | Learning disability (PT 10024092) Learning disorders (HLT 10024094)                                                                                                                                                                                                                                                                                                              |
| Higher risk  | Disability        | Limitations with self-care or activities of daily living |                                                                                                                                                                                                         | Yes                 | Impaired self-care (PT 10052404) Loss of personal independence in daily activities (PT 10079487)                                                                                                                                                                                                                                                                                 |
| Higher risk  | Disability        | other disability                                         |                                                                                                                                                                                                         | Yes                 | Amputee (PT 10075307) Bedridden (PT 100048948) Dependence on oxygen therapy (PT 10079637) Device dependence (PT 10078340) Disability (PT 10013050) Physical disability (PT 10048624) Prosthesis user (PT 10053669) Sight disability (PT 10053154) Hearing disability (PT 10053194) Walking aid user (PT 10050778) Walking disability (PT 10053204) Wheelchair user (PT 10047920) |

| CDC Category   | Condition       | Sub-condition           | Supporting Literature                                                                                                                                                                                                                                                                                                                                   | Decision to Include | MedDRA term (Version 24.0)                                                                                                                                                                                 |
|----------------|-----------------|-------------------------|---------------------------------------------------------------------------------------------------------------------------------------------------------------------------------------------------------------------------------------------------------------------------------------------------------------------------------------------------------|---------------------|------------------------------------------------------------------------------------------------------------------------------------------------------------------------------------------------------------|
| Higher risk    | Disability      | Spinal Cord Injuries    |                                                                                                                                                                                                                                                                                                                                                         | Yes                 | Spinal cord injury (PT 10041552)<br>Injury to spinal cord secondary to birth trauma (PT 10022343)<br>Spinal cord injuries NEC (HLT 10027662) Spinal cord and nerve root disorders traumatic (HLT 10041545) |
| Higher risk    | Heart condition | cardiomyopathy          | Meta-analyses from 2020 in May (n=1576), Aug (n=3027), Oct (n=2794) suggest "cardiovascular disease" NOS associated with severe infection (OR 2.5, 5.2, 2.8). Cohort studies (pub Jul-Aug 2020) suggest CAD or chronic heart disease (heart failure, ischemic heart disease, severe valvular or congenital heart disease) associated with risk of death | Yes                 | Cardiomyopathies (HLT 10007635)                                                                                                                                                                            |
| Higher risk    | Heart condition | coronary artery disease |                                                                                                                                                                                                                                                                                                                                                         | Yes                 | Coronary artery disorders NEC (HLT 10011083) Ischemic coronary artery disorders (HLT 10011085)                                                                                                             |
| Higher risk    | Heart condition | heart failure           |                                                                                                                                                                                                                                                                                                                                                         | Yes                 | Heart failures NEC (HLT 10019281) Left ventricular failures (HLT 10024120) Right ventricular failures (HLT 10039164)                                                                                       |
| Higher risk    | Heart condition | not specified           |                                                                                                                                                                                                                                                                                                                                                         |                     |                                                                                                                                                                                                            |
| Mixed evidence | Hepatitis B     |                         | CDC systematic review of 64 cohort and case/control: HBV not associated with increased risk of severe outcomes                                                                                                                                                                                                                                          | Yes                 | Hepatitis B (PT 10019731)<br>Chronic hepatitis B (PT 10008910) Congenital hepatitis B infection (PT 10010496) Perinatal HBV infection (PT 10075233)<br>Hepatitis B reactivation (PT 10058827)              |
| Mixed evidence | Hepatitis C     |                         | CDC systematic review of 64 cohort and case/control: HCV not associated with mortality or ICU admission                                                                                                                                                                                                                                                 | Yes                 | Hepatitis C (PT 10019744)<br>Chronic hepatitis C (PT 10008912) Congenital hepatitis C infection (PT 10084252)                                                                                              |
| Higher risk    | HIV             |                         | Meta-analysis/systematic review (20.9 million patients) RR for infection 1.2 (1.05-1.46), RR for mortality 1.78 (1.21-2.60), cohort studies                                                                                                                                                                                                             | Yes                 | HIV infection (PT 10020161),<br>Acquired immunodeficiency syndrome (PT 10000565)<br>Asymptomatic HIV infection (PT 10003581) Congenital HIV infection (PT 10010504)                                        |
| Mixed evidence | Hypertension    |                         | Meta-analysis, systematic review, cohort studies without clear direction of association                                                                                                                                                                                                                                                                 | Yes                 | Hypertension (PT 10020772)<br>White coat hypertension (PT 10051581) Vascular hypertensive disorders NEC (HLT 10020774)                                                                                     |

| CDC Category           | Condition                                                           | Sub-condition                        | Supporting Literature                                                                                                                                                                                                                                                                                                                                   | Decision to Include                     | MedDRA term (Version 24.0)                                                                                                                                                                                                                                      |
|------------------------|---------------------------------------------------------------------|--------------------------------------|---------------------------------------------------------------------------------------------------------------------------------------------------------------------------------------------------------------------------------------------------------------------------------------------------------------------------------------------------------|-----------------------------------------|-----------------------------------------------------------------------------------------------------------------------------------------------------------------------------------------------------------------------------------------------------------------|
| Higher risk            | Mental health disorder                                              | Mood disorders, including depression | Meta-analysis (21 studies, >91 million overall pts) suggests higher odds of hospitalization (1.3) & death (OR 1.5) in those with mood disorders (depression or bipolar), no associated with severe events (ICU/ventilation/O2/ECMO/ARDS/CPR)                                                                                                            | Yes                                     | Mood disorders NEC (HLT 10027948) Fluctuating mood symptoms (PT 10016798) Emotional and mood disturbances NEC (HLT 10014556) Affect alterations NEC (HLT 10001438) Depressive disorders (HLT 10012401) Mood alterations with depressive symptoms (HLT 10027938) |
| Higher risk            | Mental health disorder                                              | Schizophrenia spectrum disorders     | Meta-analysis (16 studies, 19k patients with mental health disorder including mood, depression, anxiety, bipolar, schizophrenia, personality, eating, EtOH, substance use) suggests higher odds of death (OR 1.4) compared to those w/o mental health disorder, higher risk with severe mental health disorder                                          | Yes                                     | Schizophrenia NEC (HLT 10039631)                                                                                                                                                                                                                                |
| Higher risk            | Neurologic Condition                                                | Dementia                             | Meta-analysis (2) and review (1) suggest higher mortality among patients with dementia (OR 3.7 or OR 5.2)                                                                                                                                                                                                                                               | Yes                                     | Alzheimer's disease incl subtype (HLT 10001897), Dementia excl Alzheimer's (HLT 10012268) Dementia NEC (HLT 10012289) Vascular dementia disorders (HLT 10062914)                                                                                                |
| Higher risk            | Obesity (BMI ≥30 kg/m <sup>2</sup> )                                |                                      | Systematic Review and Meta-Analysis (9 - n=4444) pooled OR 2.31 severe disease. See overweight                                                                                                                                                                                                                                                          | Yes                                     | Obesity (PT 10029883)                                                                                                                                                                                                                                           |
| Suggestive higher risk | Overweight (BMI ≥25 kg/m <sup>2</sup> , but <30 kg/m <sup>2</sup> ) |                                      | Cohort (England 334329) OR hospitalization early 2020 Overweight 1.39 (1.13-1.71) OR obese 1.70 (1.34-2.16) maintains on adjustment for smoking, PE, EtOH, diabetes, HTN. Not if looking at labs cholesterol and A1c. Cohort (Ney York SUNY n=684). increase aRR overweight and obese for mortality 1.4 and 1.3 and intubation 2.0 and 2.4 significant. | Yes                                     | Overweight (PT 10033307) Body mass index increased (PT 10005897)                                                                                                                                                                                                |
| Higher risk            | Physical inactivity                                                 |                                      | Cohort (Kaiser 48,4400) consistently inactive severe disease aOR 2.26 and death 2.49. Pending CDC review.                                                                                                                                                                                                                                               | Yes - though may not have been recorded | Exercise lack of (PT 10015650) Housebound (PT 10079226) Immobile (PT 10021417) Immobilization prolonged (PT 10066112)                                                                                                                                           |
| Higher risk            | Pregnancy and recent pregnancy                                      |                                      |                                                                                                                                                                                                                                                                                                                                                         | No - excluded from study                |                                                                                                                                                                                                                                                                 |
| Higher risk            | Primary Immunodeficiencies                                          |                                      | Cohort (Turkey = n26, severe disease 38.4% case cases). Pending CDC review.                                                                                                                                                                                                                                                                             | Yes                                     | Primary immunodeficiency syndromes (HLT 10036700)                                                                                                                                                                                                               |

| CDC Category           | Condition                                         | Sub-condition | Supporting Literature                                                                                                                                                                                                                                                                                                                                                                                                                                                      | Decision to Include                                   | MedDRA term (Version 24.0)                                                                                                                                                                                                                         |
|------------------------|---------------------------------------------------|---------------|----------------------------------------------------------------------------------------------------------------------------------------------------------------------------------------------------------------------------------------------------------------------------------------------------------------------------------------------------------------------------------------------------------------------------------------------------------------------------|-------------------------------------------------------|----------------------------------------------------------------------------------------------------------------------------------------------------------------------------------------------------------------------------------------------------|
| Suggestive higher risk | Sickle cell disease                               |               | Cohort (3): (n=4 non-negligible risk); (N=4 children with ACS); (n=83 France - 28% with ACS, worse with increased age, single case reports or small series.                                                                                                                                                                                                                                                                                                                | Yes                                                   | Sickle cell trait and disorders (HLT 10040651)                                                                                                                                                                                                     |
| Higher risk            | Smoking, current and former                       |               | OR 8.2 Case Control USA IBM Watson 73 million under SUD category for TUD. Meta-analysis (7; n1576) didn't actually look directly at smoking (Lung disease was RF). Meta-analysis (7; n1592 - COPD. Not smoking). meta-analysis (19; n=11,590 smoker vs never smoker) OR 1.91 severe disease. Combined meta-analysis 2.17 and 2.17 (460,592 patients).                                                                                                                      | Yes                                                   | ex-tobacco user (PT 10065386), Tobacco user (PT 10057581) Passive smoking (PT 10064066) electronic cigarette user (PT 10077387) Tobacco abuse (PT 10043903)                                                                                        |
| Higher risk            | Solid organ or hematopoietic cell transplantation |               | Multi-center cohort (n=482 SOT) mortality 20.5%, ICU 31%. Cohort - Multi center HSCT n=318 - Mild 49%, critical 15%, survival 68%. No matched systematic review KT vs Nontransplant n=88 KTR; ICU 34.1 vs 15%, death 22 vs 16%.                                                                                                                                                                                                                                            | No - excluded and/or being addressed in another study |                                                                                                                                                                                                                                                    |
| Suggestive higher risk | Substance use disorders                           |               | Case control (EHR 73million USA IBM Watson). Increased incidence aOR 8.6, OUD 10.2, TUD 8.2). Worse outcomes death and hospitalization 9.6% & 41% vs 6.6% and 30% general comparison. All subtypes of SUB increased aOR. Significantly less notable aOR for history rather than recent use. Cohort (n=188653 New York) hospitalizations EtOH 6.68aOR but all SUD or other (OUD/CAUD/COUD not significant). Cohort (Korea n=219,961) aOR for hospitalization with SUD 1.32. | Yes                                                   | Drug abuse (PT 10013654) Drug dependence (PT 10013663) Drug use disorder (10079381) Drug abuser (PT 10061111) Substance abuser (PT 10067688) Substance abuse (PT 10066169) Substance dependence (PT 10076595) Substance use disorder (PT 10079384) |
| Suggestive higher risk | Thalassemia                                       |               | Cross sectional (IRAN B-thal TD and NTD n=23 cases (15 confirmed) - no difference in incidence, increased mortality 26% vs 6.34%. Multiple confounders in Thal group compared to general population. Case series (Italy 11 cases) no difference to general population. two other single patient case reports. Did not include.                                                                                                                                             | Yes                                                   | Thalassemic disorders (HLT 10043389)                                                                                                                                                                                                               |

| CDC Category | Condition                                                     | Sub-condition | Supporting Literature                                                                                                                                                                                                                                                                                                                                                                                                                                                                                                                                                                                                                                              | Decision to Include                   | MedDRA term (Version 24.0)                                                                                                                                                                                                                                                                                                                                                                                                                                                                                                                                                                                                                                                                                                    |
|--------------|---------------------------------------------------------------|---------------|--------------------------------------------------------------------------------------------------------------------------------------------------------------------------------------------------------------------------------------------------------------------------------------------------------------------------------------------------------------------------------------------------------------------------------------------------------------------------------------------------------------------------------------------------------------------------------------------------------------------------------------------------------------------|---------------------------------------|-------------------------------------------------------------------------------------------------------------------------------------------------------------------------------------------------------------------------------------------------------------------------------------------------------------------------------------------------------------------------------------------------------------------------------------------------------------------------------------------------------------------------------------------------------------------------------------------------------------------------------------------------------------------------------------------------------------------------------|
| Higher risk  | Tuberculosis                                                  |               | CDC Systematic Review of 5 cohort studies: suggests underlying TB associated with increased risk/hazard OR of mortality. Single study limited for increased risk of hospitalization OR 1.2 (CI 1.04-1.38)                                                                                                                                                                                                                                                                                                                                                                                                                                                          | Yes                                   | Tuberculosis (PT 10044755)<br>Disseminated tuberculosis (PT 10013453)<br>Extrapulmonary tuberculosis (PT 10064445)<br>Intestinal tuberculosis (PT 10075268)<br>Joint tuberculosis (PT 10056367)<br>Lymph node tuberculosis (PT 10025183)<br>Meningitis tuberculous (PT 10027259)<br>Pulmonary tuberculosis (PT 10037440)<br>Pulmonary tuberculoma (PT 10066927)<br>Tuberculous pleurisy (PT 10045104)<br>Tuberculosis of central nervous system (PT 10061391)<br>Tuberculosis of genitourinary system (PT 10044828)<br>Tuberculosis tenosynovitis (PT 10059161)<br>Pericarditis tuberculous (PT 10055069)<br>Peritoneal tuberculosis (PT 10053583)<br>Bone tuberculosis (PT 10056377)<br>Cutaneous tuberculosis (PT 10011684) |
| Higher risk  | Use of corticosteroids or other immunosuppressive medications |               | (Meta-analysis (16) Chemotherapy within 30 days OR death 1.85. However severe COVID-19 risk did not increase OR 1.02. Significant heterogeneity. Cohort (n=523 IBD registry) steroids aOR 6.9% severe COVID. Not seen with TNFa. Conflicting: Cohort (n=959 Adult/Peds rheumatic diseases on DMARD Barcelona - Incidence 0.48% of COVID similar to general public and too small for severity (only 11 cases). Case series (n148 northern Italy autoimmune liver disease on steroid or antimetabolites) no difference on self-reported severity of illness compared to general population. Case series (n=7 Madrid, MS with anti-CD20) no increased severity noted. | No - being addressed in another study |                                                                                                                                                                                                                                                                                                                                                                                                                                                                                                                                                                                                                                                                                                                               |



**eTable 4: Study Endpoints Stratified by Trial.** The absolute number of cases for each endpoint, total number of participants available and median follow up time in months is presented. Annual attack rates with 95% confidence intervals were calculated.

| Outcome                                 | Study         | Number of Endpoints | Total Number of Participants | Median Follow Up Months (Range) | Annual Attack Rate (95% CI) |
|-----------------------------------------|---------------|---------------------|------------------------------|---------------------------------|-----------------------------|
| <b>COVID-19</b>                         | Pooled Trials | 2559                | 57692                        | 3.8 (0, 11.1)                   | 13.9% (13.3%, 14.4%)        |
|                                         | Moderna       | 842                 | 15162                        | 4.7 (0, 8.1)                    | 14.6% (13.6%, 15.6%)        |
|                                         | AstraZeneca   | 370                 | 10793                        | 2.9 (0, 11.1)                   | 12.9% (11.6%, 14.3%)        |
|                                         | Janssen       | 1191                | 21890                        | 4 (0, 9.5)                      | 16% (15.1%, 16.9%)          |
|                                         | Novavax       | 156                 | 9847                         | 2.9 (0, 9.1)                    | 6.6% (5.6%, 7.8%)           |
| <b>Severe COVID-19</b>                  | Pooled Trials | 367                 | 57692                        | 3.9 (0, 11.1)                   | 2% (1.8%, 2.2%)             |
|                                         | Moderna       | 115                 | 15162                        | 4.8 (0, 8.1)                    | 2% (1.6%, 2.3%)             |
|                                         | AstraZeneca   | 18                  | 10793                        | 2.9 (0, 11.1)                   | 0.6% (0.4%, 1%)             |
|                                         | Janssen       | 229                 | 21890                        | 4 (0, 9.5)                      | 3% (2.6%, 3.4%)             |
|                                         | Novavax       | 5                   | 9847                         | 2.9 (0, 9.1)                    | 0.2% (0.1%, 0.5%)           |
| <b>SARS-COV-2 Infection</b>             | Pooled Trials | 3774                | 47492                        | 3.9 (0, 11.1)                   | 24.3% (23.5%, 25.1%)        |
|                                         | Moderna       | 1333                | 14164                        | 4.7 (0.6, 8.1)                  | 24.6% (23.3%, 26%)          |
|                                         | AstraZeneca   | 351                 | 8524                         | 3.2 (1.3, 11.1)                 | 13.9% (12.5%, 15.5%)        |
|                                         | Janssen       | 1956                | 19608                        | 3.8 (0, 9.5)                    | 31.1% (29.7%, 32.5%)        |
|                                         | Novavax       | 134                 | 5196                         | 3.1 (0.9, 5.7)                  | 10.1% (8.5%, 12%)           |
| <b>Subclinical SARS-COV-2 Infection</b> | Pooled Trials | 1612                | 47492                        | 3.9 (0, 11.1)                   | 10.3% (9.8%, 10.9%)         |
|                                         | Moderna       | 567                 | 14164                        | 4.8 (0.6, 8.1)                  | 10.4% (9.6%, 11.3%)         |
|                                         | AstraZeneca   | 167                 | 8524                         | 3.2 (1.3, 11.1)                 | 6.6% (5.7%, 7.7%)           |
|                                         | Janssen       | 792                 | 19608                        | 3.8 (0, 9.5)                    | 12.6% (11.7%, 13.5%)        |
|                                         | Novavax       | 86                  | 5196                         | 3.1 (1.2, 5.7)                  | 6.5% (5.2%, 8%)             |

**eTable 5: Variant Counts from COVID-19 Cases.** Sequencing data was available from a subset of cases where sufficient quantity of the virus was available for the four trials. Counts represent absolute numbers. Eleven COVID-19 cases had more than one variant detected; the one based on specimen collected closest to SARS-CoV-2 diagnosis was included.

| Variant            | Moderna, No.  | AZ, No.       |               | Janssen, No. |               |               | Novavax, No.  |
|--------------------|---------------|---------------|---------------|--------------|---------------|---------------|---------------|
|                    | North America | South America | North America | South Africa | South America | North America | North America |
| Alpha              | --            | --            | 11            | 2            | 11            | 16            | 38            |
| B.1.1.519          | --            | --            | --            | --           | --            | 4             | --            |
| B.1.621            | --            | --            | --            | --           | 60            | --            | --            |
| Beta               | --            | --            | --            | 70           | --            | --            | 1             |
| Delta              | --            | --            | --            | 12           | --            | --            | --            |
| Epsilon            | 14            | --            | 18            | --           | 2             | 19            | 8             |
| Gamma              | 1             | 1             | --            | --           | 120           | --            | 3             |
| Iota               | --            | --            | --            | --           | --            | 4             | 3             |
| Lambda             | --            | 19            | --            | 1            | 46            | --            | --            |
| Other              | 406           | 10            | 131           | 2            | 172           | 142           | 54            |
| Other + E484K      | 6             | --            | 10            | 3            | 22            | 3             | 4             |
| Reference Sequence | --            | --            | --            | --           | 21            | 113           | --            |
| Reference Strain   | 171           | --            | 11            | --           | --            | --            | 6             |
| Zeta               | 2             | --            | --            | --           | 104           | 1             | 1             |
