# Supplementary material for: Clinical and Demographic Factors Associated With COVID-19, Severe COVID-19, and SARS-CoV-2 Infection in Adults: A Secondary Cross-Protocol Analysis of 4 Randomized Clinical Trials
Source: PubMed Central journal article supplement (PMC10346130; doi:10.1001/jamanetworkopen.2023.23349), 2023-07-13
Supplement: jamanetwopen-e2323349-s003.pdf [file jamanetwopen-e2323349-s003.pdf]

## Data Sharing Statement

Theodore. Clinical and Demographic Factors Associated With COVID-19, Severe COVID-19, and SARS-CoV-2 Infection in Adults. *JAMA Netw Open*. Published July 13, 2023.

doi:10.1001/jamanetworkopen.2023.23349

### Data

**Data available:** Yes

**Data types:** Other (please specify)

**Additional Information:** Access to data underlying findings described in this manuscript may be allowed in accordance with the individual data sharing policies of the pharmaceutical companies contributing data to this analysis. As each of the clinical trials included in this study are ongoing, data availability will begin after publication of the final study results in 2023 and 2024.

**How to access data:** Please reference the individual data sharing policies of the pharmaceutical companies contributing data to this analysis.

**When available:** With publication

### Supporting Documents

**Document types:** None

### Additional Information

**Who can access the data:** To be decided by pharmaceutical companies that contributed original data

**Types of analyses:** To be decided by pharmaceutical companies that contributed original data

**Mechanisms of data availability:** To be decided by pharmaceutical companies that contributed original data
